# Supplementary material for: Switchable synthesis of glycosyl selenides or diselenides with direct use of selenium as the selenating agent
Source: Royal Society of Chemistry journal article supplement (doi:10.1039/d1qo00045d), 2021-01-01
Supplement: d1qo00045d1.pdf [file d1qo00045d1.pdf]

## SUPPORTING INFORMATION

### Switchable Synthesis of Glycosyl Selenides or Diselenides With Direct Use of Selenium as Selenating Agent

Alfonso Iadonisi, Serena Traboni, Domenica Capasso, Emiliano Bedini, Sabrina Cuomo, Sonia Di Gaetano, Giulia Vessella

#### TABLE OF CONTENTS

|                                                                                       |           |
|---------------------------------------------------------------------------------------|-----------|
| General remarks and experimental synthetic procedures                                 | S2 – S4   |
| Spectral data of all synthesized compounds                                            | S5 - S8   |
| References                                                                            | S9        |
| Copies of $^1\text{H}$ and $^{13}\text{C}$ NMR spectra of symmetrical compounds 9-12  | S10 – 13  |
| Copies of $^1\text{H}$ and $^{13}\text{C}$ NMR spectra of symmetrical compounds 15-22 | S14 – 21  |
| Copies of $^1\text{H}$ and $^{13}\text{C}$ NMR spectra of compounds 23 and 25         | S22 – S23 |
| Copies of $^1\text{H}$ and $^{13}\text{C}$ NMR spectra of compounds 26 and 27         | S24 - S25 |
| Experimental section of biological studies                                            | S25 – S26 |

### **General remarks.**

All reagents adopted in the one-pot protocols are commercially available and were used as supplied without any pre-treatment. Selenium, sodium borohydride, iodine and poly(methylhydrosiloxane) (PMHS) were purchased from Sigma Aldrich. The progress of reactions was monitored by TLC; after elution in the suitable eluent, the plates were soaked in 5% concentrated H<sub>2</sub>SO<sub>4</sub> in ethanol and heated at 230 °C. NMR spectra were recorded in a 400 Bruker MHz device. Reactions were performed at 0.5–1 mmol scale adopting the stoichiometric ratios indicated in the pertinent entries of the tables and in the schemes.

### **General procedure for the synthesis of glycosyl iodides**

To a solution of a peracetylated sugar (390 mg, 1.0 mmol) in anhydrous DCM (6 mL) was added I<sub>2</sub> (279 mg, 1.1 mmol), and poly(methylhydrosiloxane) (PMHS) (65 µL, 1.1 mmol) (caution: exothermic reaction). The system was refluxed until complete consumption of the starting material (5–10 min as monitored by TLC, eluent: hexane/ethyl acetate mixtures). The mixture was then diluted with DCM and the organic phase washed with aq. sodium carbonate containing sodium thiosulfate (this latter is added portionwise as a solid, until consumption of residual iodine indicated by discoloration of the organic phase upon shaking). The organic phase was then washed with water, dried, and concentrated. The crude residue was directly adopted for the subsequent selenoglycosidation steps.

### **General procedure for the synthesis of symmetrical diglycosyl selenides**

A mixture of elementary selenium (95 mg, 1.2 mmol) and sodium borohydride (137 mg, 3.6 mmol) was suspended in DMF (3 mL) and the suspension was kept under stirring at rt. After 40 minutes triethyl phosphite (175 µL, 1.0 mmol) was added (with an instantaneous discoloration) and the mixture was poured to a vessel containing crude glycosyl iodide (or the GlcNAc chloride). The vessel adopted for the first step was washed with portionwise DMF (3 mL overall). The mixture was kept under stirring at room temperature until completion of the reaction (in all cases less than two hours). The reaction was quenched with acetic acid (0.25 mL) and the mixture was transferred into a separatory funnel and diluted with DCM. The organic phase was washed with aq sodium carbonate and the aqueous phase re-extracted with DCM. Combined organic phases were dried with sodium sulfate, filtrated and concentrated. The residue was treated with pyridine (1 mL) and acetic anhydride (0.5 mL) for one-hour at rt. The mixture was then treated with methanol (ca 0.5 mL) in a cold bath, transferred into a separatory funnel and diluted with DCM. The organic phase was washed with aq sodium carbonate and the aqueous phase was then re-extracted with DCM. Combined organic phases were dried with sodium sulfate, filtrated and concentrated. The residue was purified by silica-gel flash chromatography (hexane/ethyl acetate or

dichloromethane/methanol mixtures). When detectable, the selenide/diselenide ratio was determined by NMR analysis of chromatographed products.

#### **General procedure for the synthesis of diglycosyl diselenides**

A mixture of elementary selenium (1.1 or 1.5 mmol, see Scheme 2) and sodium borohydride (1.2 or 1.0 mmol, see Scheme 2) was suspended in DMF (3 - 4 mL) and the suspension was kept under stirring at rt. After 40 minutes the mixture was poured to a vessel containing the crude glycosyl iodide (or the GlcNAc chloride) (1.0 mmol) in DMF (3 mL). The vessel adopted for the first step was washed with portionwise DMF (3 mL overall). The mixture was kept under stirring at room temperature until completion of the reaction (in all cases less than two hours). The reaction was quenched with acetic acid (0.25 mL) and the mixture was transferred into a separatory funnel and diluted with DCM. The organic phase was washed with aq sodium carbonate and the aqueous phase re-extracted with DCM and combined organic phases were dried with sodium sulfate, filtrated and concentrated. The residue was treated with pyridine (1 mL) and acetic anhydride (0.5 mL) for one-hour at rt. The mixture was then treated with methanol (ca 0.5 mL) in a cold bath, transferred into a separatory funnel and diluted with DCM. The organic phase was washed with aq sodium carbonate and the aqueous phase was then re-extracted with DCM and combined organic phases were dried with sodium sulfate, filtrated and concentrated. The residue was purified by silica-gel flash chromatography (hexane/ethyl acetate or dichloromethane/methanol mixtures). When detectable, the selenide/diselenide ratio was determined by NMR analysis of chromatographed products.

#### **Synthesis of unsymmetrical diglycosyl selenides from a diselenide precursor**

To a solution of galactosyl diselenide (31 mg, 0.038 mmol) in DMF (0.45 mL) were added sequentially triethyl phosphite (165  $\mu$ L of a 0.23 M solution in DMF, 1 equiv) and NaBH<sub>4</sub> (29  $\mu$ L of a 1.3 M solution in DMF, 2 equiv). After a few seconds the mixture was poured to a vessel containing the crude glycosyl iodide (or the GlcNAc chloride) (0.11 mmol). The vessel adopted for the first step was washed with portionwise DMF (0.5 mL overall). After the appropriate time (see Scheme 4 and 5), the reaction was quenched with acetic acid (five drops) and the mixture transferred into a separatory funnel and diluted with DCM. The organic phase was washed with aq sodium carbonate and the aqueous phase was then re-extracted with DCM. Combined organic phases were dried with sodium sulfate, filtrated and concentrated. The residue was treated with pyridine (0.5 mL) and acetic anhydride (0.25 mL) for one-hour at rt. The mixture was then treated with methanol (ca 0.3 mL) in a cold bath, transferred into a separatory funnel and diluted with DCM. The organic phase was washed with aq sodium carbonate and the aqueous phase was then re-extracted with DCM, and combined organic phases were dried with sodium sulfate, filtrated and concentrated. The residue was purified by silica-gel flash chromatography (hexane/ethyl acetate or ethyl acetate alone).

### One-pot synthesis of unsymmetrical diglycosyl selenide **25**

A mixture of elementary selenium (10 mg, 0.126 mmol) and sodium borohydride (5.2 mg, 0.137 mmol) was suspended in DMF (0.35 mL) and the suspension was kept under stirring at rt. After 40 minutes the mixture was poured to a vessel containing the crude galactosyl iodide **7** (prepared from 45 mg of the peracetylated precursor, 0.115 mmol). The vessel adopted for the first step was washed with portionwise DMF (0.5 mL overall). After stirring for 1 hour at rt, were added sequentially triethyl phosphite (10  $\mu$ L, 0.057 mmol), NaBH<sub>4</sub> (90  $\mu$ L of a 1.3 M solution in DMF, 0.115 mmol), and solid GlcNAc chloride **14** (62 mg, 0.169 mmol). The mixture was stirred for an additional hour and then the reaction was quenched with acetic acid (0.15 mL) and the mixture transferred into a separatory funnel and diluted with DCM. The organic phase was washed with aq sodium carbonate and the aqueous phase was then re-extracted with DCM and combined organic phases were dried with sodium sulfate, filtrated and concentrated. The residue was purified by silica-gel flash chromatography (eluent: ethyl acetate) to yield pure **25** (52 mg, 61 % yield).

### Zemplen deacetylation: synthesis of galactosyl selenide **26** and galactosyl diselenide **27**

To a solution of **9** or **11** in MeOH (20-30 mg/mL) was added a solution of sodium methoxide in methanol (0.1 eq), preliminarily prepared by adding a weighted amount of NaH (60 % suspension) in methanol. The mixture was left under stirring at rt until detection via TLC (eluent: ethyl acetate) of the reaction completion (generally 2-4 hours were needed). The mixture was treated with Amberlyst H<sup>+</sup> resin (preliminarily washed with methanol) until neutrality, and then a slightly differentiated procedure was applied to isolate either **26** or **27**. Owing to the poor solubility of **26** in methanol, multiple washings with methanol (ca 1 mL each) were needed to suspend this product (a white solid) in a pipette and transfer it to another vessel, where it was concentrated *in vacuo*.

When diselenide **27** had to be separated from minor amounts of **26** (in the case in which the peracetylated diselenide **11** precursor was partially contaminated by **9**, see Scheme 2), small amounts of methanol (ca 0.3 - 0.5 mL) were used in each washing, taking care of not transferring the insoluble solid (if present) in the pipette. The transferred methanol solution was concentrated under vacuum to afford purified diselenide **27**.

### Characterization data of all synthesized compounds

#### Di(2,3,4,6-tetra-O-acetyl- $\beta$ -D-galactosyl) selenide (**9**)<sup>1</sup>

Purified as a foam by silica gel chromatography (eluent: hexane/ethyl acetate from 1:1 to 3:7). R<sub>f</sub> (hexane/ethyl acetate 2:3) 0.42.  $[\alpha]_D$  -29.5 (c 1.00, CHCl<sub>3</sub>); <sup>1</sup>H NMR (400 MHz, CDCl<sub>3</sub>)  $\delta$  5.41 (1H, bd, J = 2.8 Hz, H-4), 5.26 (1H, t, J = 10.0 Hz, H-2), 5.10 (1H, dd, J = 2.8 and 10.0 Hz, H-3), 5.10 (1H, d, J =

10.0 Hz, H-1), 4.15-4.00 (H<sub>2</sub>-6, m, 2 H), 3.86 (1H, bt, J = 6.8 Hz, H-5), 2.13, 2.02, 2.01, 1.94 (12H, 4 x s, 4 x -COCH<sub>3</sub>). <sup>13</sup>C NMR (100 MHz, CDCl<sub>3</sub>) δ 170.1, 170.0, 169.8, 169.5, 76.9, 75.7, 67.9, 67.1, 61.3, 20.5. Anal. Calcd. for C<sub>28</sub>H<sub>38</sub>O<sub>18</sub>Se: C, 45.35; H, 5.17. Found: C, 45.45; H, 5.10. MALDI HRMS m/z [M + Na]<sup>+</sup> calc. for (C<sub>28</sub>H<sub>38</sub>O<sub>18</sub>SeNa) 765.1121, found 765.1115.

#### **Di(2,3,4,6-tetra-O-acetyl-β-D-glucosyl) selenide (10)<sup>2</sup>**

Purified as a white solid by silica gel chromatography (eluent: hexane/ethyl acetate from 1:1 to 3:7). R<sub>f</sub> (hexane/ethyl acetate 2:3) 0.40. [α]<sub>D</sub> -61.5 (c 1.10, CHCl<sub>3</sub>); <sup>1</sup>H NMR (400 MHz, CDCl<sub>3</sub>) δ 5.25–5.10 (3H, overlapped signals, H-2, H-3, and H-4), 5.03 (1H, d, J = 10.0 Hz, H-1), 4.25 (1H, dd, J = 4.8 and 12.4 Hz, H-6a), 4.16 (1H, dd, J = 2.4 and 12.4 Hz, H-6b), 3.67 (1H, m, H-5), 2.11, 2.03, 2.02, 1.99 (12H, 4 x s, 4 x -COCH<sub>3</sub>). <sup>13</sup>C NMR (100 MHz, CDCl<sub>3</sub>) δ 170.3, 169.8, 169.1 (x2), 76.9, 73.6, 70.8, 68.0, 61.9, 20.4. Anal. Calcd. for C<sub>28</sub>H<sub>38</sub>O<sub>18</sub>Se: C, 45.35; H, 5.17. Found: C, 45.30; H, 5.20. MALDI HRMS m/z [M + Na]<sup>+</sup> calc. for (C<sub>28</sub>H<sub>38</sub>O<sub>18</sub>SeNa) 765.1121, found 765.1128.

#### **Di(2,3,4,6-tetra-O-acetyl-β-D-galactosyl) diselenide (11)<sup>1</sup>**

Purified as a foam by silica gel chromatography (eluent: hexane/ethyl acetate from 1:1 to 1:4). R<sub>f</sub> (hexane/ethyl acetate 1:1) 0.30. [α]<sub>D</sub> -37.5 (c 0.80, CHCl<sub>3</sub>); <sup>1</sup>H NMR (400 MHz, CDCl<sub>3</sub>) δ 5.44 (1H, bd, J = 2.8 Hz, H-4), 5.35 (1H, t, J = 10.0 Hz, H-2), 5.06 (1H, dd, J = 2.8 and 10.0 Hz, H-3), 4.91 (1H, d, J = 10.0 Hz, H-1), 4.20 (1H, dd, J = 6.8 and 12.0 Hz, H-6a), 4.09 (1H, bt, J = 6.8 Hz, H-5), 4.03 (1H, dd, J = 6.8 and 12.0 Hz, H-6b), 2.16, 2.06, 2.03, 1.97 (12H, 4 x s, 4 x -COCH<sub>3</sub>). <sup>13</sup>C NMR (100 MHz, CDCl<sub>3</sub>) δ 170.0 (x2), 169.9, 169.6, 81.1, 75.4, 71.4, 69.3, 67.0, 60.7, 20.5. Anal. Calcd. for C<sub>28</sub>H<sub>38</sub>O<sub>18</sub>Se<sub>2</sub>: C, 40.99; H, 4.67. Found: C, 41.00; H, 4.65. MALDI HRMS m/z [M + Na]<sup>+</sup> calc. for (C<sub>28</sub>H<sub>38</sub>O<sub>18</sub>Se<sub>2</sub>Na) 845.0286, found 845.0281.

#### **Di(2,3,4,6-tetra-O-acetyl-β-D-glucosyl) diselenide (12)<sup>2</sup>**

Purified as a foam by silica gel chromatography (eluent: hexane/ethyl acetate from 1:1 to 1:4). R<sub>f</sub> (hexane/ethyl acetate 1:1) 0.32. [α]<sub>D</sub> -102.6 (c 1.40, CHCl<sub>3</sub>); <sup>1</sup>H NMR (400 MHz, CDCl<sub>3</sub>) δ 5.21 (1H, t, J = 9.6 Hz), 5.15 (1H, t, J = 9.6 Hz), 5.06 (1H, t, J = 9.6 Hz), 4.91 (1H, d, J = 9.6 Hz, H-1), 4.27 (1H, dd, J = 3.6 and 12.4 Hz, H-6a), 4.14 (1H, dd, J = 2.0 and 12.4 Hz, H-6b), 3.75 (1H, m, H-5), 2.08, 2.04, 1.99, 1.96 (12H, 4 x s, 4 x -COCH<sub>3</sub>). <sup>13</sup>C NMR (100 MHz, CDCl<sub>3</sub>) δ 170.5, 169.9, 169.2 (x2), 79.6, 73.5, 71.5, 67.8, 61.5, 20.6-20.4. Anal. Calcd. for C<sub>28</sub>H<sub>38</sub>O<sub>18</sub>Se<sub>2</sub>: C, 40.99; H, 4.67. Found: C, 41.5 H, 4.60. MALDI HRMS m/z [M + Na]<sup>+</sup> calc. for (C<sub>28</sub>H<sub>38</sub>O<sub>18</sub>Se<sub>2</sub>Na) 845.0286, found 845.0293.

**Di(3,4,6-tri-O-acetyl-2-deoxy-2-acetamido-β-D-glucosyl) selenide (15)**

Purified as a foam by silica gel chromatography (eluent: dichlormethane/MeOH from 1:0 to 95:5).  $[\alpha]_D -59.6$  (c 0.40,  $\text{CHCl}_3$ );  $^1\text{H}$  NMR (400 MHz,  $\text{CDCl}_3$ )  $\delta$  6.10 (1H, d,  $J = 9.6$  Hz, 2-NH), 5.15–5.10 (2H, overlapped signals, H-3 and H-4), 5.07 (1H, d,  $J = 10.4$  Hz, H-1), 4.30–4.10 (3H, overlapped signals, H-2, H<sub>2</sub>-6), 3.67 (1H, m, H-5), 2.10, 2.03 (x2), 1.93 (12H, 3 x s, 4 x -COCH<sub>3</sub>).  $^{13}\text{C}$  NMR (100 MHz,  $\text{CDCl}_3$ )  $\delta$  170.9, 170.6, 170.5, 169.2, 77.2, 73.7, 68.1, 62.0, 53.4, 23.0, 20.7–20.5. Anal. Calcd. for  $\text{C}_{28}\text{H}_{40}\text{N}_2\text{O}_{16}\text{Se}$ : C, 45.47; H, 5.45. Found: C, 45.55 H, 5.40. MALDI HRMS  $m/z$   $[\text{M} + \text{Na}]^+$  calc. for ( $\text{C}_{28}\text{H}_{40}\text{N}_2\text{O}_{16}\text{SeNa}$ ) 763.1441, found 763.1445.

**Di(2,3,6,2',3',4',6'-hepta-O-acetyl-β-D-lactosyl) selenide (16)**

Purified as a foam by silica gel chromatography (eluent: hexane/ethyl acetate from 2:3 to 1:4). R<sub>f</sub> (hexane/ethyl acetate 3:7) 0.40.  $[\alpha]_D -20.9$  (c 1.58,  $\text{CHCl}_3$ );  $^1\text{H}$  NMR (400 MHz,  $\text{CDCl}_3$ )  $\delta$  5.29 (1H, bd,  $J = 2.8$  Hz, H-4'), 5.13 (1H, t,  $J = 8.8$  Hz), 5.05 (1H, dd,  $J = 7.6$  and 10.0 Hz), 5.00–4.95 (2H, overlapped signals), 4.92 (1H, dd,  $J = 3.2$  and 10.4 Hz, H-3'), 4.44 (1H, d,  $J = 7.6$  Hz, H-1'), 4.42 (1H, bd,  $J = 9.6$  Hz, H-6a), 4.15–4.00 (3H, overlapped signals), 3.83 (1H, bt,  $J = 6.8$  Hz, H-5'), 3.75 (1H, t,  $J = 9.6$  Hz, H-4), 3.54 (1H, m, H-5), 2.09, 2.08, 2.00 (x3), 1.99, 1.91 (21H, 7 x -COCH<sub>3</sub>).  $^{13}\text{C}$  NMR (100 MHz,  $\text{CDCl}_3$ )  $\delta$  170.2–168.9, 100.9, 77.8, 76.1, 76.0, 73.6, 71.2, 70.8, 70.5, 68.9, 66.4, 62.1, 60.6, 20.5. Anal. Calcd. for  $\text{C}_{52}\text{H}_{70}\text{O}_{34}\text{Se}$ : C, 47.39; H, 5.35. Found: C, 47.50 H, 5.30. MALDI HRMS  $m/z$   $[\text{M} + \text{Na}]^+$  calc. for ( $\text{C}_{52}\text{H}_{70}\text{O}_{34}\text{SeNa}$ ) 1341.2811, found 1341.2820.

**Di(2,3,4,6-tetra-O-acetyl-α-D-mannosyl) selenide (17)**

Purified as a foam by silica gel chromatography (eluent: hexane/ethyl acetate from 2:3 to 1:4). R<sub>f</sub> (hexane/ethyl acetate 3:7) 0.47.  $^1\text{H}$  NMR (400 MHz,  $\text{CDCl}_3$ )  $\delta$  5.49 (1H, bd,  $J = 2.8$  Hz, H-2), 5.30 (1H, bs, H-1), 5.25 (1H, t,  $J = 10.0$  Hz, H-4), 5.06 (1H, dd,  $J = 2.8$  and 10.0 Hz, H-3), 4.22 (1H, dd,  $J = 6.8$  and 12.4 Hz, H-6a), 4.16 (1H, dd,  $J = 12.4$  Hz, H-6a), 3.68 (1H, m, H-5), 2.16, 2.08, 2.03, 1.95 (12H, 4 x s, 4 x -COCH<sub>3</sub>).  $^{13}\text{C}$  NMR (100 MHz,  $\text{CDCl}_3$ )  $\delta$  170.5–169.2 (COCH<sub>3</sub>), 77.7, 75.1, 71.5, 70.5, 65.5, 62.5, 20.4. Anal. Calcd. for  $\text{C}_{28}\text{H}_{38}\text{O}_{18}\text{Se}$ : C, 45.35; H, 5.17. Found: C, 45.30; H, 5.15. MALDI HRMS  $m/z$   $[\text{M} + \text{Na}]^+$  calc. for ( $\text{C}_{28}\text{H}_{38}\text{O}_{18}\text{SeNa}$ ) 765.1121, found 765.1127.

**Di(2,3,4-tri-O-acetyl-β-L-fucosyl) selenide (18)**

Purified as a foam by silica gel chromatography (eluent: hexane/ethyl acetate from 1:1 to 2:3). R<sub>f</sub> (hexane/ethyl acetate 1:1) 0.45.  $[\alpha]_D +7.7$  (c 0.90,  $\text{CHCl}_3$ );  $^1\text{H}$  NMR (400 MHz,  $\text{CDCl}_3$ )  $\delta$  5.29 (1H, bd,  $J = 2.8$  Hz, H-4), 5.27 (1H, t,  $J = 10.0$  Hz, H-2), 5.05 (1H, dd,  $J = 2.8$  and 10.0 Hz, H-3), 5.02 (1H, d,  $J = 10.0$  Hz, H-1), 3.79 (1H, bq,  $J = 6.8$  Hz, H-5), 2.17, 2.03, 1.93 (9H, 3 x s, 3 x -COCH<sub>3</sub>), 1.21 (3H, d,  $J =$

6.8 Hz, CH<sub>3</sub>-6). <sup>13</sup>C NMR (100 MHz, CDCl<sub>3</sub>) δ 170.4, 169.9, 169.4, 76.9, 74.4, 71.9, 70.2, 68.1, 20.6-20.5, 16.2. Anal. Calcd. for C<sub>24</sub>H<sub>34</sub>O<sub>14</sub>Se: C, 46.09; H, 5.48. Found: C, 46.20; H, 5.40. MALDI HRMS m/z [M + Na]<sup>+</sup> calc. for (C<sub>24</sub>H<sub>34</sub>O<sub>14</sub>SeNa) 649.1011, found 649.1003.

#### **Di(3,4,6-tri-O-acetyl-2-deoxy-2-acetamido-β-D-glucosyl) diselenide (19)**

Purified as a foam by silica gel chromatography (eluent: dichlormethane/MeOH from 1:0 to 95:5). [α]<sub>D</sub> -11.3 (c 1.10, CHCl<sub>3</sub>); <sup>1</sup>H NMR (400 MHz, CDCl<sub>3</sub>) δ 6.30 (1H, d, J = 9.6 Hz, NH-2), 5.30 (1H, t, J = 10.0 Hz, H-3), 5.12 (1H, d, H = 10.4 Hz, H-1), 5.02 (1H, t, J = 10.0 Hz, H-4), 4.36 (1H, dd, J = 5.2 and 12.4 Hz, H-6a), 4.15-4.00 (2H, overlapped signals, H-6b and H-2), 3.75 (1H, m, H-5), 2.09, 2.06 (x2), 1.99 (12H, 3 x s, 4 x -COCH<sub>3</sub>). <sup>13</sup>C NMR (100 MHz, CDCl<sub>3</sub>) δ 170.5, 170.4 (x2), 169.3, 81.8, 76.9, 72.9, 68.3, 61.9, 55.0, 23.2, 20.8, 20.5 (x2). Anal. Calcd. for C<sub>28</sub>H<sub>40</sub>N<sub>2</sub>O<sub>16</sub>Se<sub>2</sub>: C, 41.08; H, 4.93. Found: C, 41.00; H, 4.95. MALDI HRMS m/z [M + Na]<sup>+</sup> calc. for (C<sub>28</sub>H<sub>40</sub>N<sub>2</sub>O<sub>16</sub>Se<sub>2</sub>Na) 843.0606, found 843.0615.

#### **Di(2,3,6,2',3',4',6'-hepta-O-acetyl-β-D-lactosyl) diselenide (20)<sup>3</sup>**

Purified as a foam by silica gel chromatography (eluent: hexane/ethyl acetate from 2:3 to 1:4). R<sub>f</sub> (hexane/ethyl acetate 1:3) 0.54. [α]<sub>D</sub> -48.4 (c 1.45, CHCl<sub>3</sub>); <sup>1</sup>H NMR (400 MHz, CDCl<sub>3</sub>) δ 5.32 (1H, bd, J = 2.8 Hz, H-4'), 5.19 (1H, t, J = 9.2 Hz), 5.15-5.00 (3H, overlapped signals), 4.83 (1H, d, J = 10.0 Hz, H-1), 4.50 (1H, bd, J = 9.6 Hz, H-6a), 4.45 (1H, d, J = 7.6 Hz, H-1'), 4.15-3.95 (3H, overlapped signals), 3.88 (1H, bt, J = 6.8 Hz, H-5'), 3.85 (1H, t, J = 9.6 Hz, H-4), 3.70 (1H, m, H-5), 2.12 (x2), 2.02 (x4), 1.94 (21H, 7 x -COCH<sub>3</sub>). <sup>13</sup>C NMR (100 MHz, CDCl<sub>3</sub>) δ 169.5-168.7, 100.8, 79.4, 77.6, 75.7, 73.5, 72.0, 70.8, 70.4, 68.9, 66.4, 61.5, 60.5, 20.6-20.5. Anal. Calcd. for C<sub>52</sub>H<sub>70</sub>O<sub>34</sub>Se<sub>2</sub>: C, 44.71; H, 5.05. Found: C, 44.80; H, 5.00. MALDI HRMS m/z [M + Na]<sup>+</sup> calc. for (C<sub>52</sub>H<sub>70</sub>O<sub>34</sub>Se<sub>2</sub>Na) 1421.1977, found 1421.1970.

#### **Di(2,3,4,6-tetra-O-acetyl-α-D-mannosyl) diselenide (21)**

Purified as a foam by silica gel chromatography (eluent: hexane/ethyl acetate from 2:3 to 1:4). R<sub>f</sub> (hexane/ethyl acetate 3:7) 0.47. [α]<sub>D</sub> + 5.5 (c 1.15, CHCl<sub>3</sub>); <sup>1</sup>H NMR (400 MHz, CDCl<sub>3</sub>) δ 5.60 (1H, bd, J = 2.4 Hz, H-2), 5.31 (1H, bs, H-1), 5.28 (1H, t, J = 10.0 Hz, H-4), 5.13 (1H, dd, J = 2.4 and 10.0 Hz, H-3), 4.22 (2H, d, J = 3.6 Hz, H<sub>2</sub>-6), 3.75 (1H, m, H-5), 2.19, 2.10, 2.04, 1.98 (12H, 4 x s, 4 x -COCH<sub>3</sub>). <sup>13</sup>C NMR (100 MHz, CDCl<sub>3</sub>) δ 170.5, 169.8 (x2), 169.4 (COCH<sub>3</sub>), 81.2, 77.5, 71.3, 70.3, 65.3, 62.0, 20.5. Anal. Calcd. for C<sub>28</sub>H<sub>38</sub>O<sub>18</sub>Se<sub>2</sub>: C, 40.99; H, 4.67. Found: C, 41.90; H, 4.60. MALDI HRMS m/z [M + Na]<sup>+</sup> calc. for (C<sub>28</sub>H<sub>38</sub>O<sub>18</sub>Se<sub>2</sub>Na) 845.0286, found 845.0281.

#### **Di(2,3,4-tri-O-acetyl-β-L-fucosyl) diselenide (22)**

Purified as a foam by silica gel chromatography (eluent: hexane/ethyl acetate from 1:1 to 2:3). R<sub>f</sub> (hexane/ethyl acetate 1:1) 0.45. [α]<sub>D</sub> + 2.5 (c 0.60, CHCl<sub>3</sub>); <sup>1</sup>H NMR (400 MHz, CDCl<sub>3</sub>) δ 5.32 (1H, t, J

= 10.0 Hz, H-2), 5.25 (1H, bd, J = 3.2 Hz, H-4), 5.03 (1H, dd, J = 3.2 and 10.0 Hz, H-3), 4.95 (1H, d, J = 10.0 Hz, H-1), 3.87 (1H, bq, J = 6.4 Hz, H-5), 2.16, 2.05, 1.96 (9H, 3 x s, 3 x -COCH<sub>3</sub>), 1.20 (3H, d, J = 6.4 Hz, CH<sub>3</sub>-6). <sup>13</sup>C NMR (100 MHz, CDCl<sub>3</sub>) δ 170.5, 169.9, 169.6, 82.3, 74.4, 71.9, 70.3, 69.3, 20.8, 20.5 (x2), 16.2. Anal. Calcd. for C<sub>24</sub>H<sub>34</sub>O<sub>14</sub>Se<sub>2</sub>: C, 40.92; H, 4.86. Found: C, 40.80; H, 4.90. MALDI HRMS m/z [M + Na]<sup>+</sup> calc. for (C<sub>24</sub>H<sub>34</sub>O<sub>14</sub>Se<sub>2</sub>Na) 729.0177, found 729.0185.

**(2,3,4,6-tetra-O-acetyl-β-D-galactosyl)-(2,3,4,6-tetra-O-acetyl-β-D-glucosyl) selenide (23)**

Purified as a foam by silica gel chromatography (eluent: hexane/ethyl acetate 2:3). R<sub>f</sub> (hexane/ethyl acetate 2:3) 0.50. [α]<sub>D</sub> -21.7 (c 1.05, CHCl<sub>3</sub>); <sup>1</sup>H NMR (400 MHz, CDCl<sub>3</sub>) δ 5.44 (1H, bd, J = 2.8 Hz, H-4 Gal), 5.29 (1H, t, J = 10.0 Hz, H-2 Gal), 5.18 (1H, t, J = 9.6 Hz, H-3 Glc), 5.20-5.00 (5H, overlapped signals; H-1, H-2 and H-4 Glc, H-1 and H-3 Gal), 4.24 (1H, dd, J = 5.2 and 11.6 Hz, H-6a Glc), 4.20-4.00 (3H, overlapped signals, H-6b Glc and H<sub>2</sub>-6 Gal), 3.89 (1H, bt, J = 6.8 Hz, H-5 Gal), 3.67 (1H, m, H-5 Glc), 2.16, 2.09, 2.05, 2.04, 2.03 (x2), 2.02, 1.99 (24H, 8 x s, 8 x -COCH<sub>3</sub>). <sup>13</sup>C NMR (100 MHz, CDCl<sub>3</sub>) δ 170.0 (x2), 169.5, 169.2, 76.2, 75.7, 73.6, 71.5, 70.8, 68.1, 67.9, 67.1, 62.0, 61.4, 20.5. Anal. Calcd. for C<sub>28</sub>H<sub>38</sub>O<sub>18</sub>Se: C, 45.35; H, 5.17. Found: C, 45.30; H, 5.15. MALDI HRMS m/z [M + Na]<sup>+</sup> calc. for (C<sub>28</sub>H<sub>38</sub>O<sub>18</sub>SeNa) 765.1121, found 765.1127.

**(2,3,4,6-tetra-O-acetyl-β-D-galactosyl)-(3,4,6-tri-O-acetyl-2-deoxy-2-acetamido-β-D-glucosyl) selenide (25)**

Purified as a foam by silica gel chromatography (eluent: ethyl acetate). R<sub>f</sub> (ethyl acetate) 0.60. [α]<sub>D</sub> -32.8 (c 1.55, CHCl<sub>3</sub>); <sup>1</sup>H NMR (400 MHz, CDCl<sub>3</sub>) δ 5.83 (1H, d, J = 9.2 Hz, NH-2 GlcNAc), 5.44 (1H, bd, J = 2.8 Hz, H-4 Gal), 5.30 (1H, t, J = 10.0 Hz, H-2 Gal), 5.10-5.00 (5H, overlapped signals; H-1, H-3 and H-4 GlcNAc, H-1 and H-3 Gal), 4.24-4.05 (5H, overlapped signals; H-2, H<sub>2</sub>-6 GlcNAc, H<sub>2</sub>-6 Gal), 3.89 (1H, bt, J = 6.8 Hz, H-5 Gal), 3.62 (1H, m, H-5 Glc), 2.15, 2.07, 2.05, 2.03, 2.02, 2.00 (x2), 1.96 (24H, 7 x s, 8 x -COCH<sub>3</sub>).

<sup>13</sup>C NMR (100 MHz, CDCl<sub>3</sub>) δ 170.9-170.1, 169.1, 78.0, 77.3, 71.4, 68.2, 67.8, 67.3, 62.2, 61.5, 53.4, 22.9, 20.5. Anal. Calcd. for C<sub>28</sub>H<sub>39</sub>NO<sub>17</sub>Se: C, 45.41; H, 5.31. Found: C, 45.50; H, 5.25. MALDI HRMS m/z [M + Na]<sup>+</sup> calc. for (C<sub>28</sub>H<sub>39</sub>NO<sub>17</sub>SeNa) 764.1281, found 764.1274.

**Di(β-D-galactopyranosyl) selenide (26)<sup>1</sup>**

Purified as a white solid after filtration (see procedure of the Zemplen deacetylation). <sup>1</sup>H NMR (400 MHz, D<sub>2</sub>O) δ 4.96 (1H, d, J = 10.0 Hz, H-1), 3.90 (1H, bd, J = 3.2 Hz, H-4), 3.72-3.55 (5H, overlapped signals, H-2, H-3, H-5 and H<sub>2</sub>-6). <sup>13</sup>C NMR (100 MHz, CDCl<sub>3</sub>) δ 80.3, 80.2, 73.6, 70.2, 68.7, 61.1. Anal. Calcd.

for C<sub>12</sub>H<sub>22</sub>O<sub>10</sub>Se: C, 35.56; H, 5.47. Found: C, 35.45; H, 5.50. MALDI HRMS m/z [M + Na]<sup>+</sup> calc. for (C<sub>12</sub>H<sub>22</sub>O<sub>10</sub>SeNa) 429.0276, found 429.0285.

#### Di(β-D-galactopyranosyl) diselenide (27)<sup>1</sup>

Purified as an oil after selective solubilization with methanol (see procedure of the Zemplen deacetylation). <sup>1</sup>H NMR (400 MHz, D<sub>2</sub>O) δ 4.78 (1H, d, J = 10.0 Hz, H-1), 3.87 (1H, bd, J = 3.2 Hz, H-4), 3.75 (1H, t, J = 10.0 Hz, H-2), 3.70-3.50 (4H, overlapped signals, H-3, H-5 and H<sub>2</sub>-6). <sup>13</sup>C NMR (100 MHz, CDCl<sub>3</sub>) δ 83.5, 80.4, 73.5, 70.2, 68.7, 60.9. Anal. Calcd. for C<sub>12</sub>H<sub>22</sub>O<sub>10</sub>Se<sub>2</sub>: C, 29.76; H, 4.58. Found: C, 29.85; H, 4.55. MALDI HRMS m/z [M + Na]<sup>+</sup> calc. for (C<sub>12</sub>H<sub>22</sub>O<sub>10</sub>Se<sub>2</sub>Na) 508.9441, found 508.9433.

#### References

- 1) André, S.; Kövér, K. E.; Gabius, H.-J.; Szilágyi, L. *Bioorg. Med. Chem. Lett.* **2015**, *25*, 931-935.
- 2) Wagner, G.; Nuhn, P. *Arch. Pharm.* **1964**, *297*, 461-473
- 3) Saravanan, V.; Porhiel, E.; Chandrasekaran, S. *Tetrahedron Lett.* **2003**, *44*, 2257-2260
- 4) Kim, C.; Lee, J.; Park, M.-S. *Arch. Pharm. Res.* **2015**, *38*, 659–665.

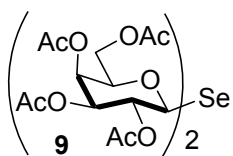

eb190116 1 1 C:\Bruker\TopSpin4.0.5\data\nmr

BRI 33 1825 estratto AE

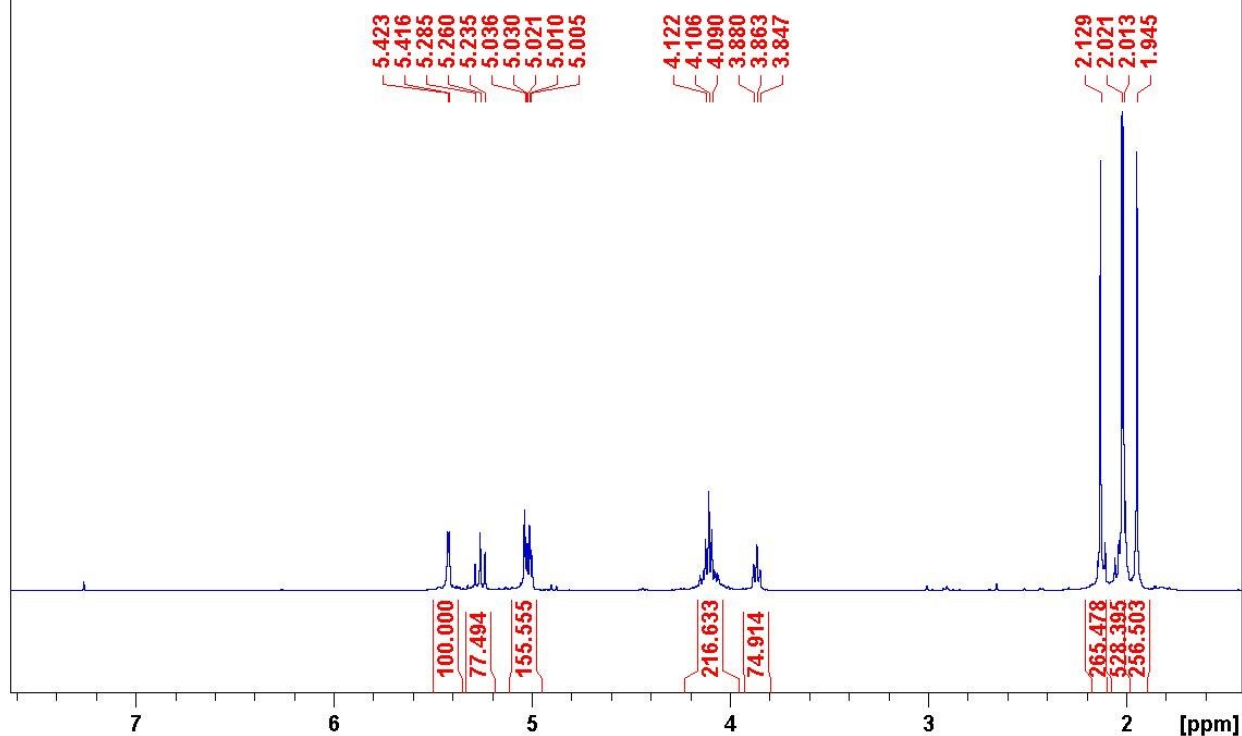

eb190116 2 1 C:\Bruker\TopSpin4.0.5\data\nmr

BRI 33 1531 dopo estraz 13C

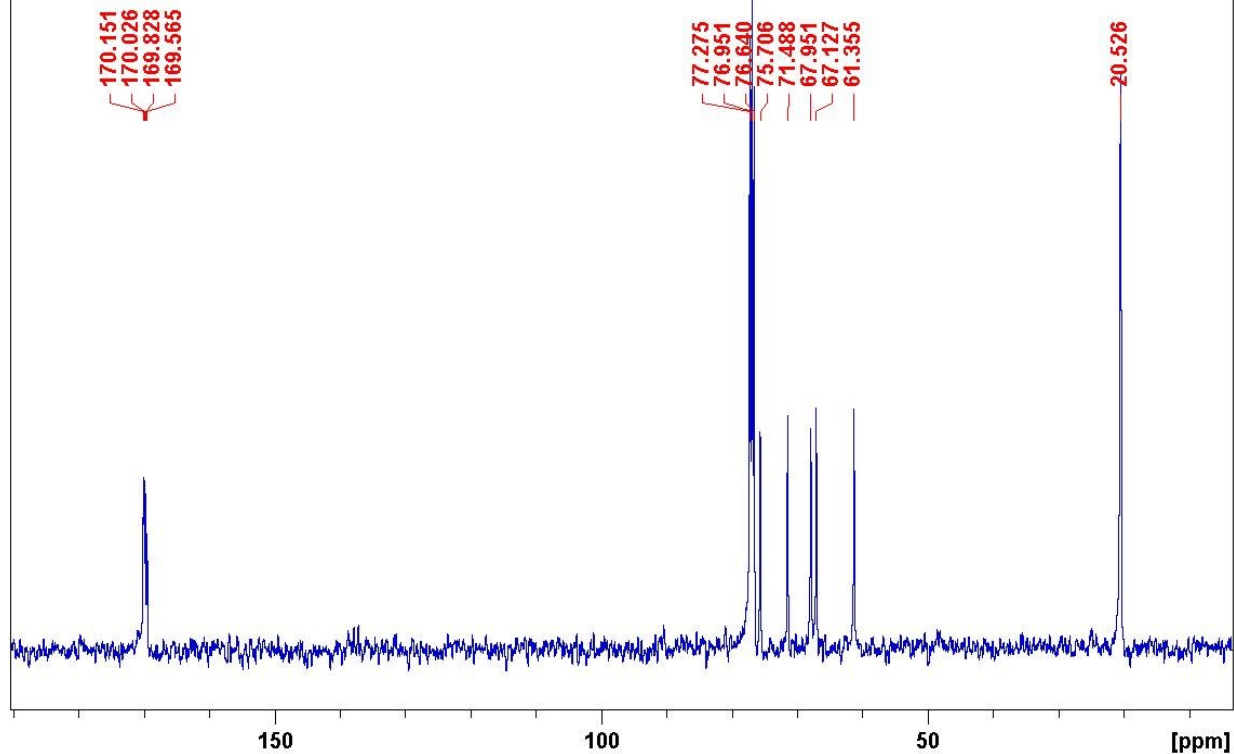

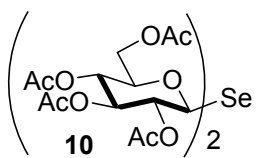

eb181003New400 67 1 C:\Bruker\TopSpin4.0.5\data\nmr

BR6 2952

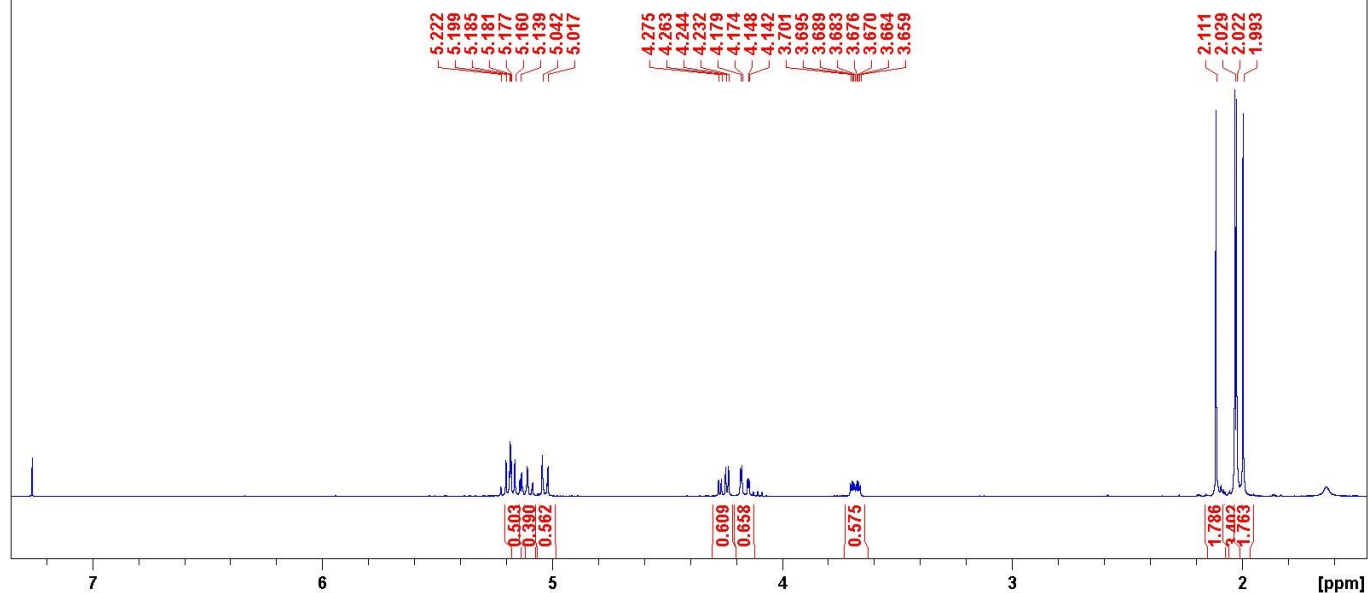

eb200512 41 1 C:\Bruker\TopSpin4.0.5\data\nmr

BRI 6 crom 13C

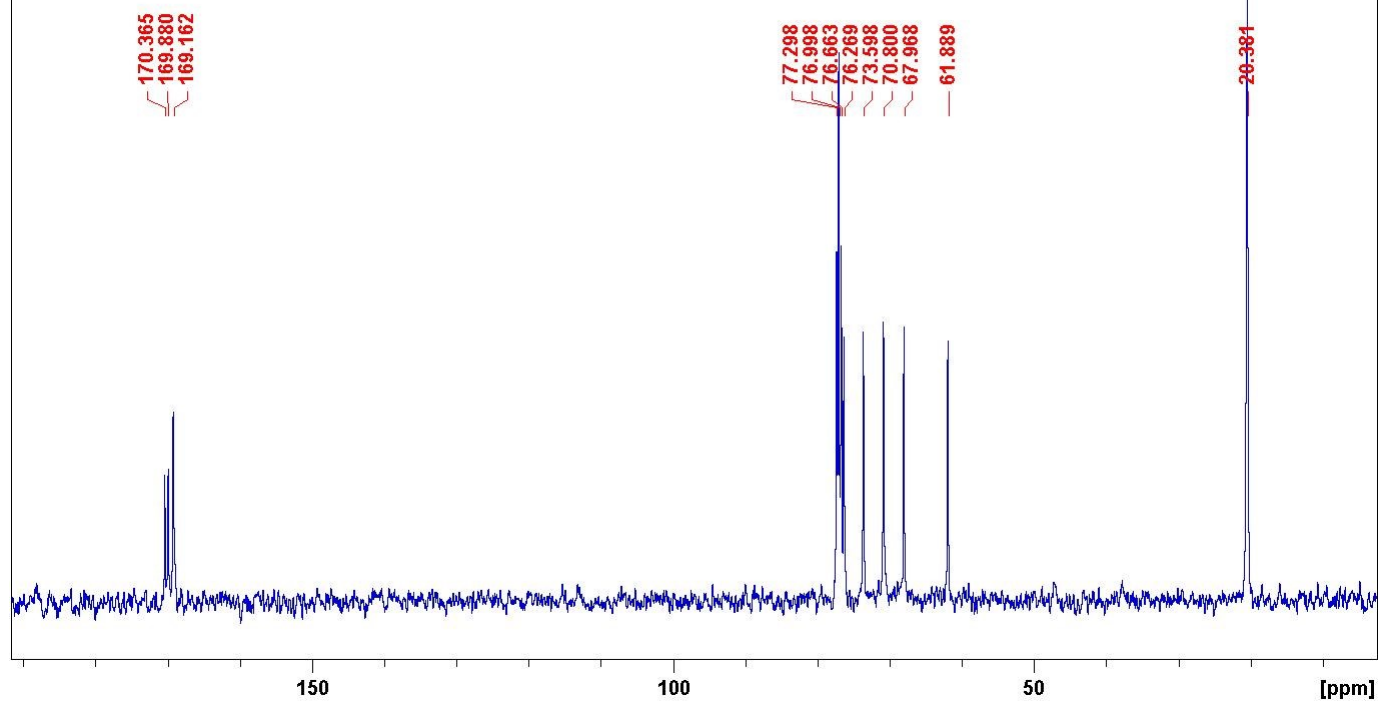

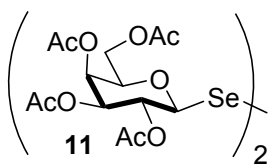

eb200601 10 1 C:\Bruker\TopSpin4.0.5\data\nmr

BRI 50 crom 2 Gal2Se xOAc

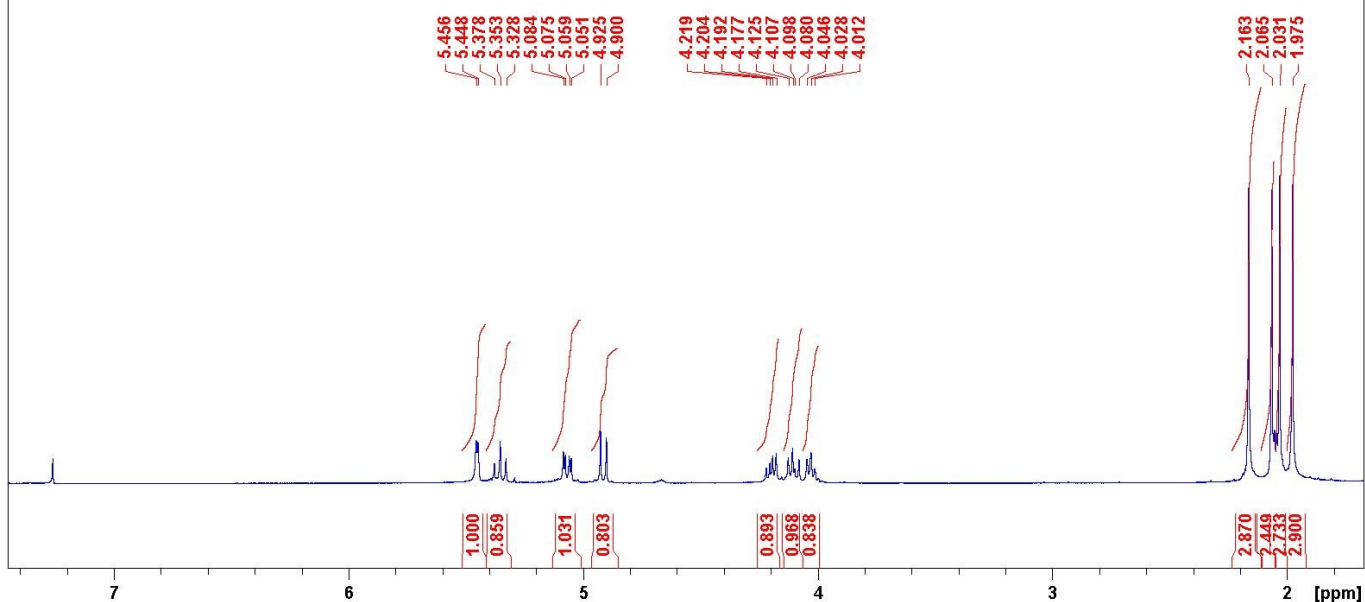

eb190401 122 1 C:\Bruker\TopSpin4.0.5\data\nmr

BRI 50 2840 13C

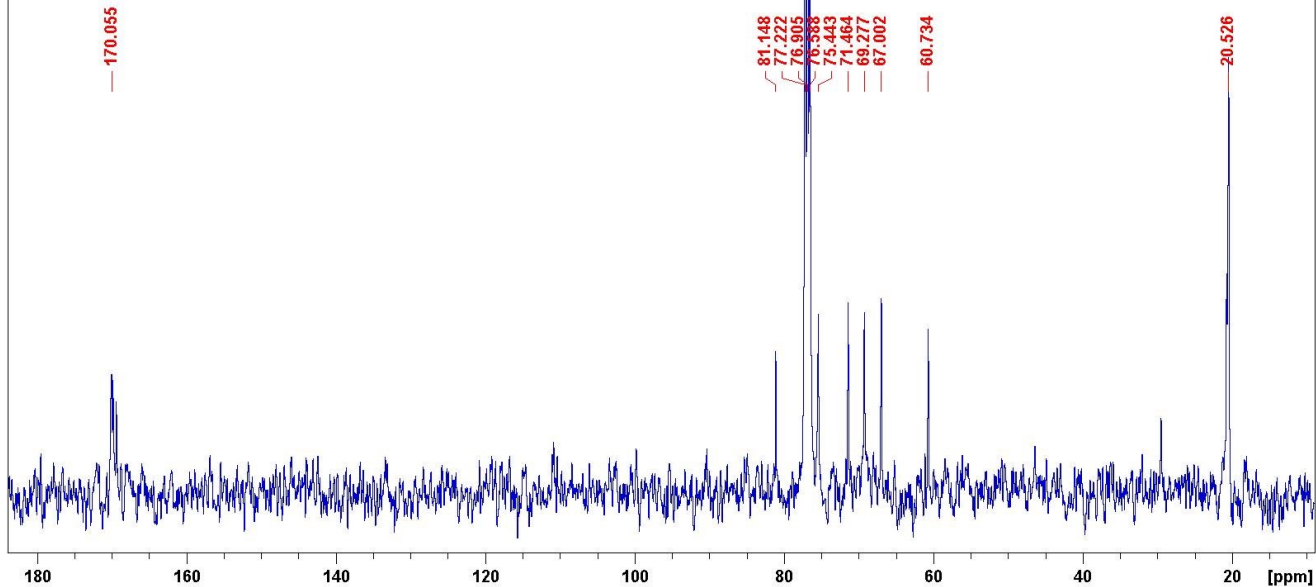

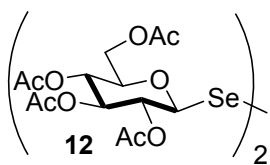

eb190516 96 1 C:\Bruker\TopSpin4.0.5\data\nmr

BRI 60 2340 vero

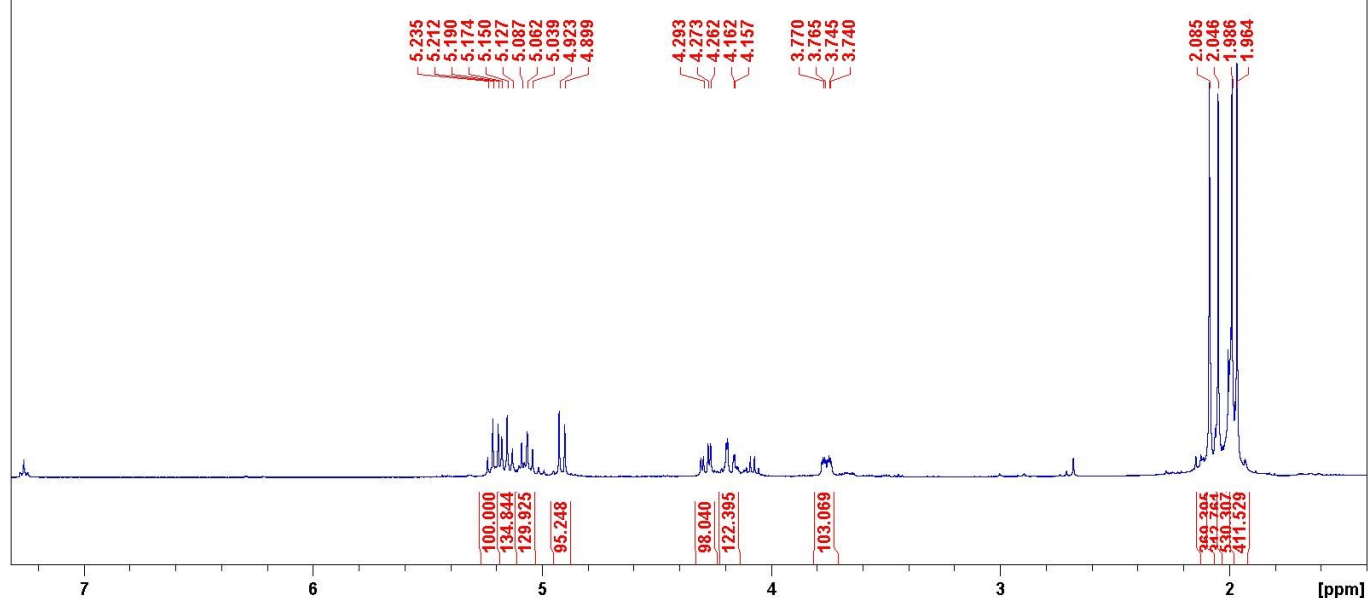

eb190516 97 1 C:\Bruker\TopSpin4.0.5\data\nmr

BRI 60 2340 13C

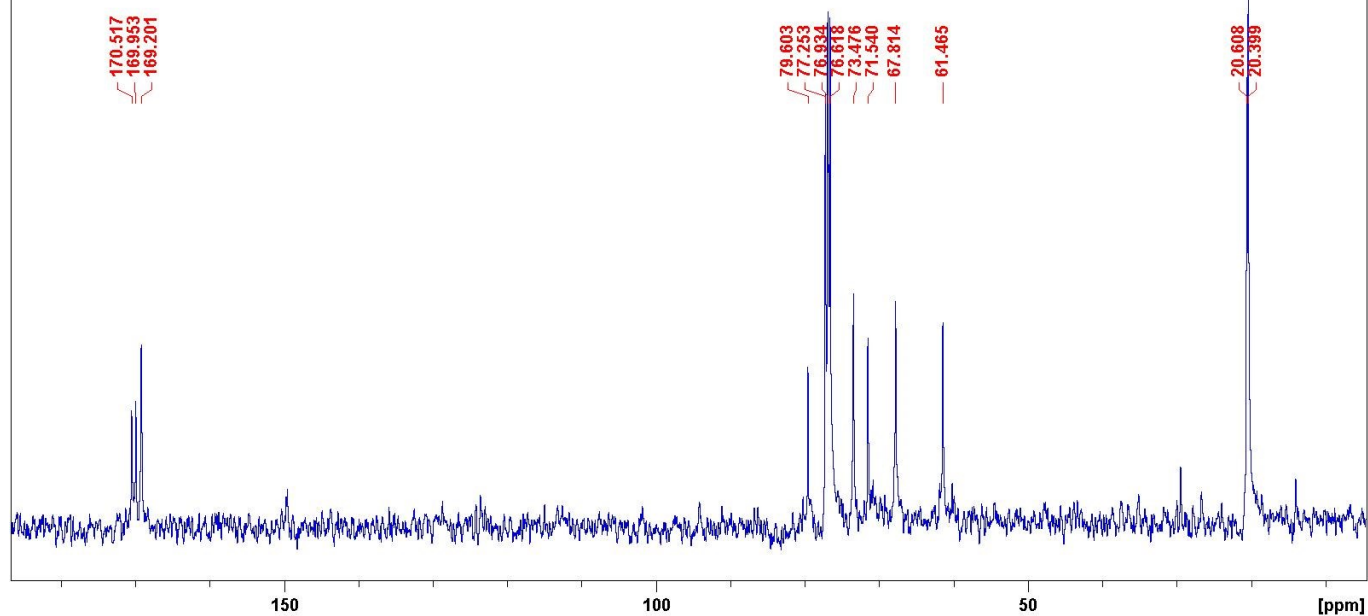

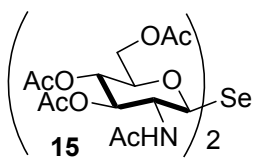

eb200512 28 1 C:\Bruker\TopSpin4.0.5\data\nmr

BRI 40 3844 GlcNAc2Se xAc

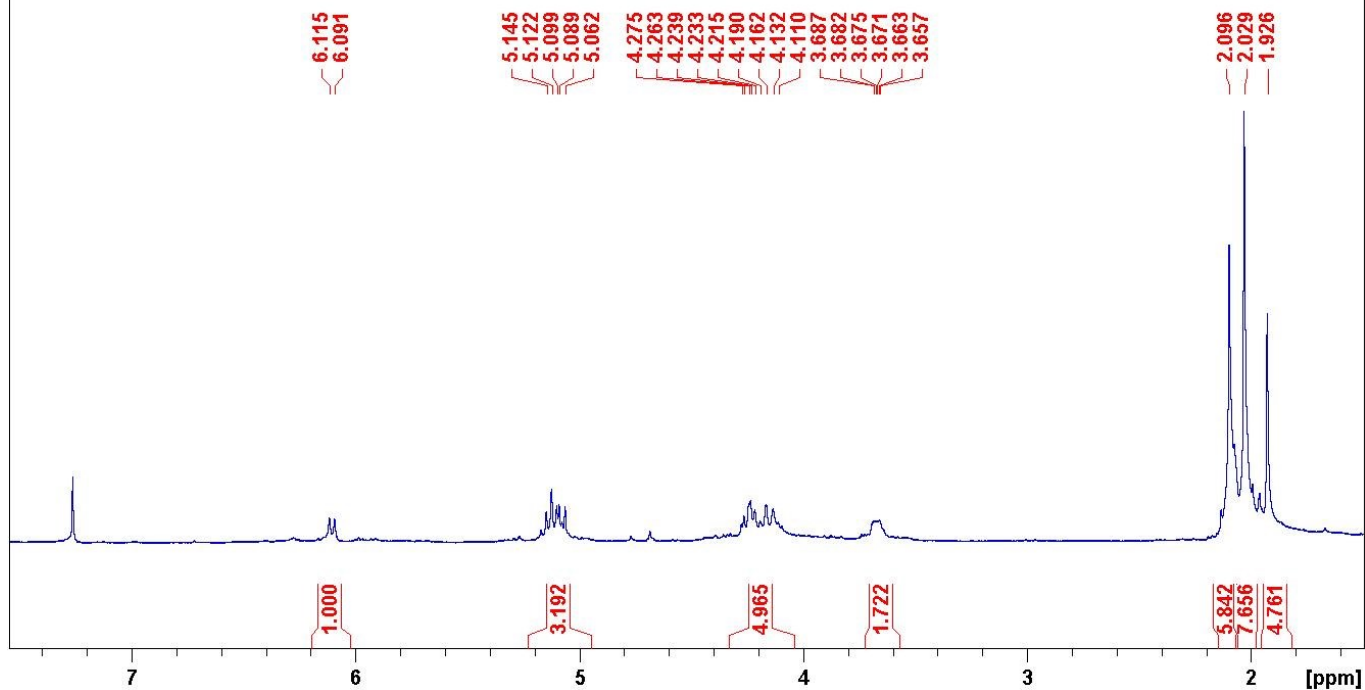

eb200512 29 1 C:\Bruker\TopSpin4.0.5\data\nmr

BRI 40 3844 GlcNAc2Se xOAc 13C

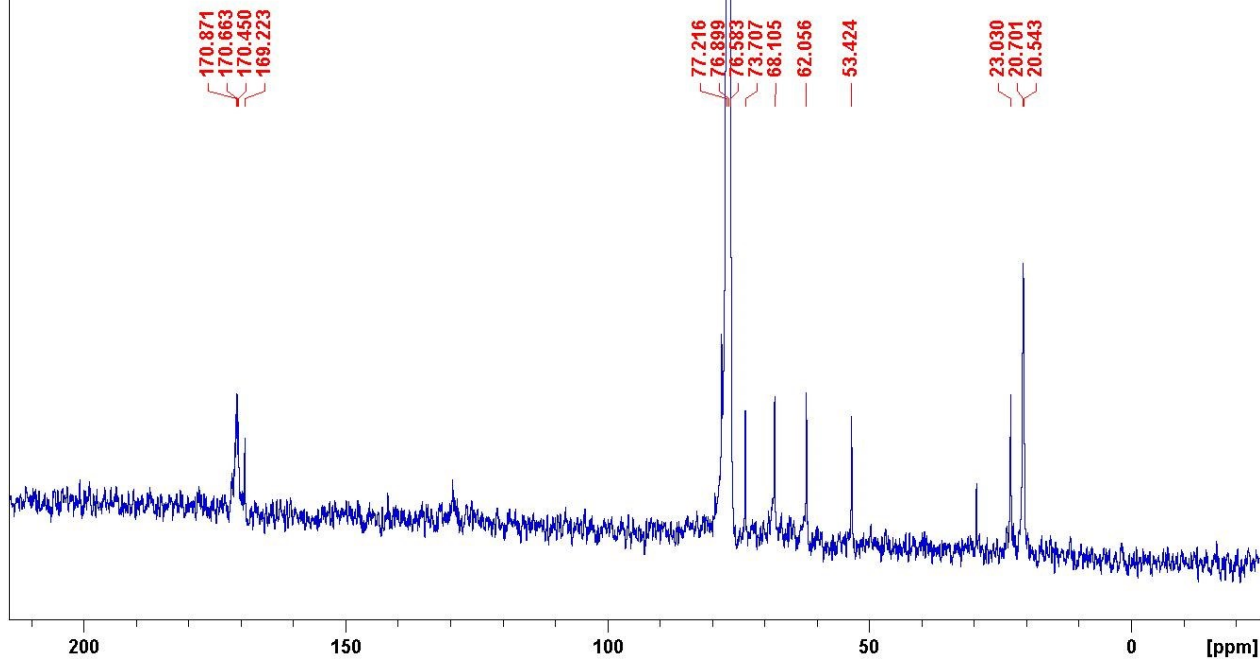

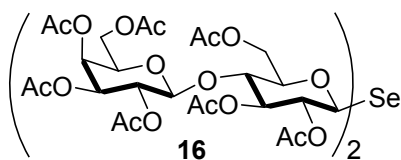

eb200512 22 1 C:\Bruker\TopSpin4.0.5\data\nmr

BRI 95 2131 Lac2SexAc pulito

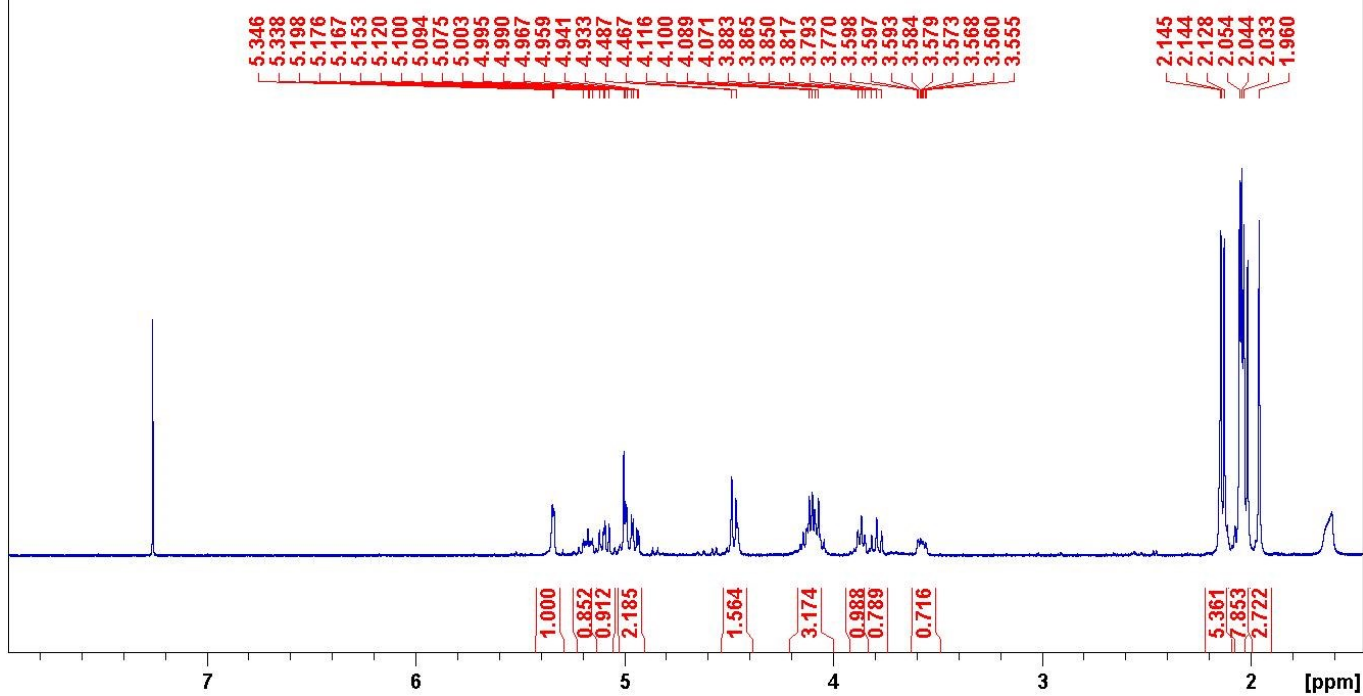

eb200512 24 1 C:\Bruker\TopSpin4.0.5\data\nmr

BRI 95 2131 Lac2Se xOAc 13C

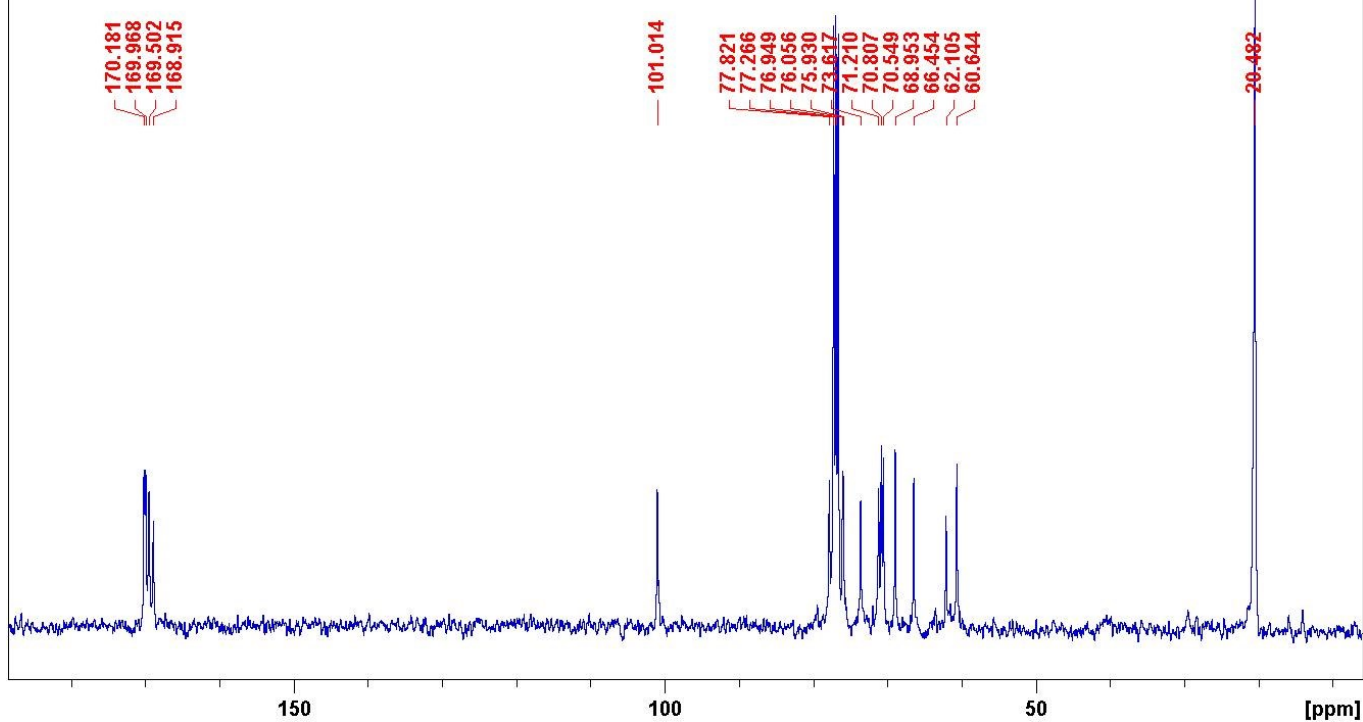

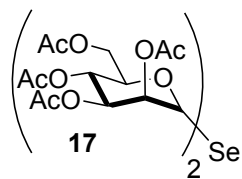

eb200512 12 1 C:\Bruker\TopSpin4.0.5\data\nmr

Man2Se xAc BFI 29 crom

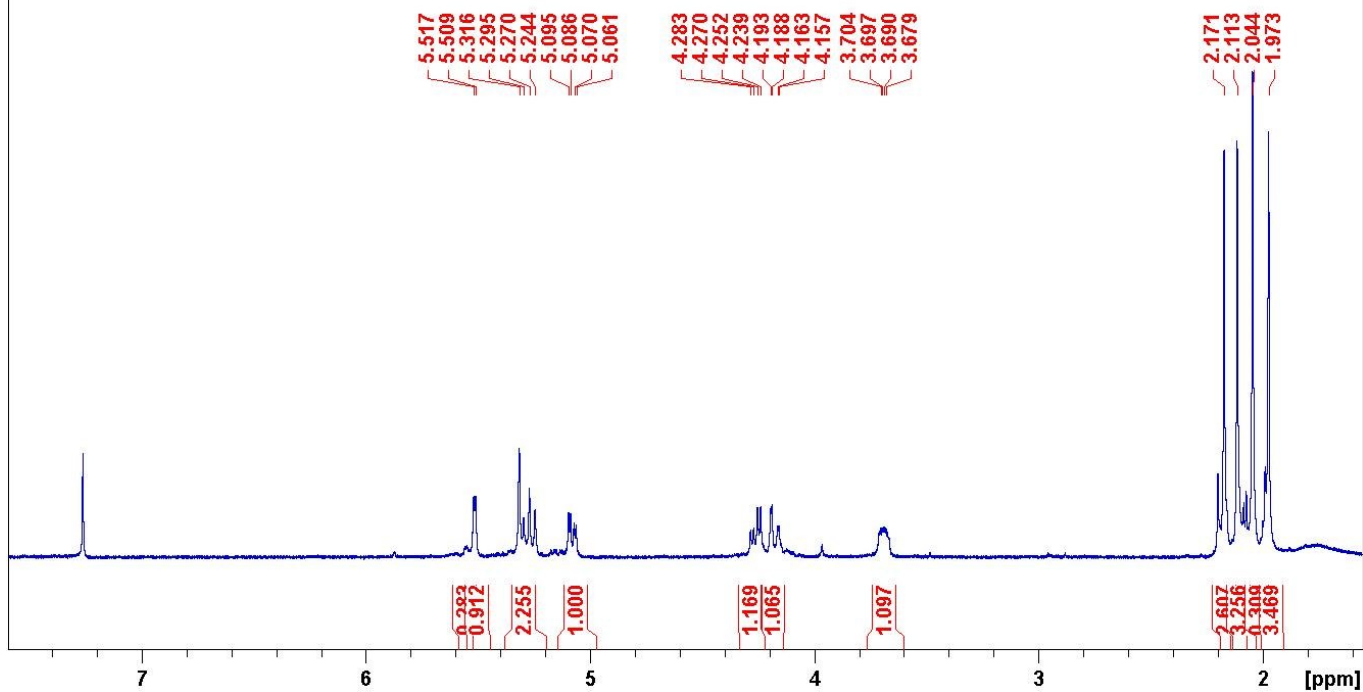

eb190108 13 1 C:\Bruker\TopSpin4.0.5\data\nmr

BFI 29 283713C

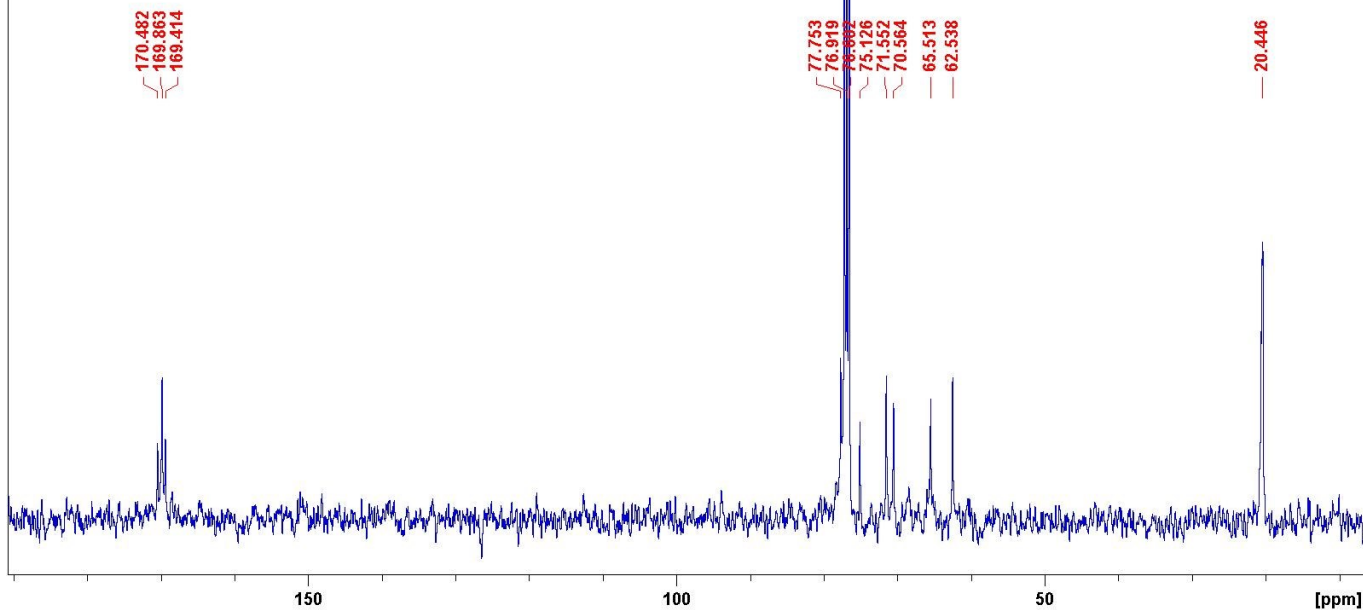

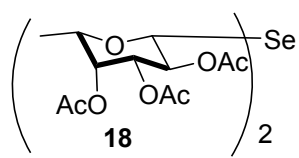

eb200904 30 1 C:\Bruker\TopSpin4.0.5\data\nmr

BRI179 1523

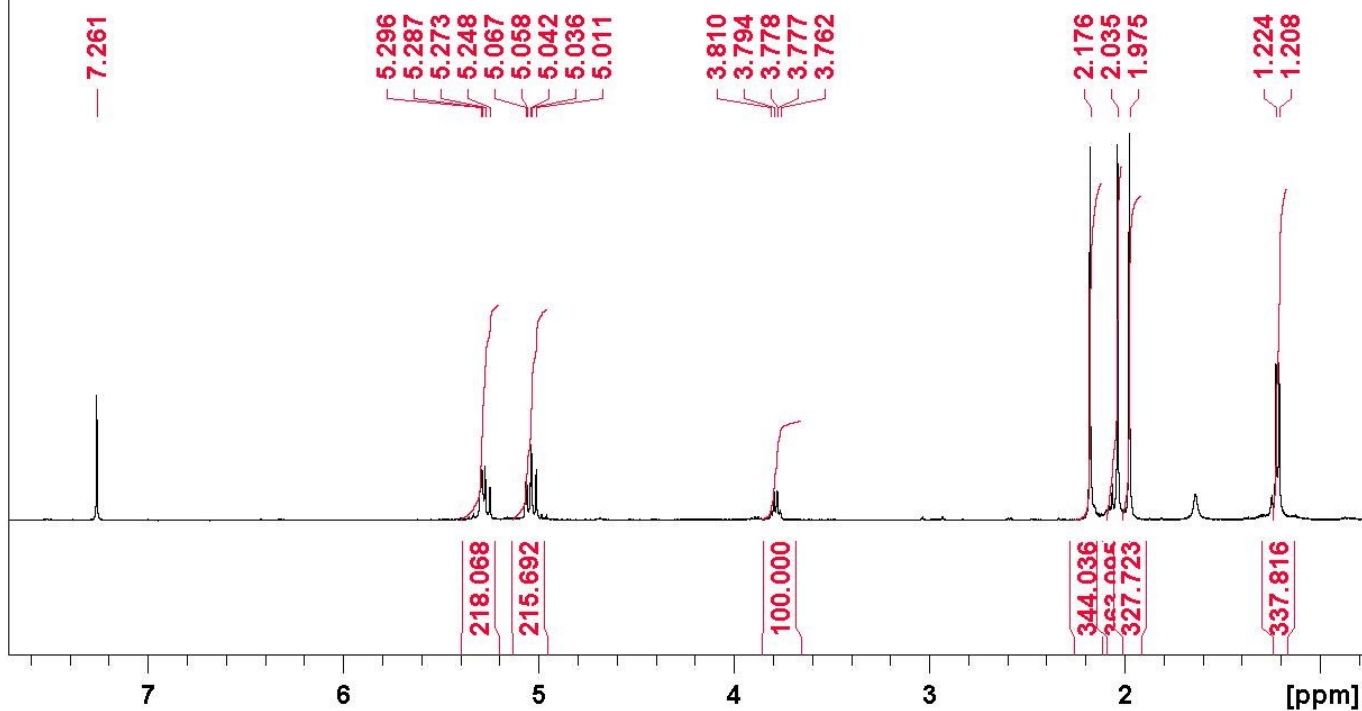

eb181016 5 1 C:\Bruker\TopSpin4.0.5\data\nmr

BRI 9 1735 C13

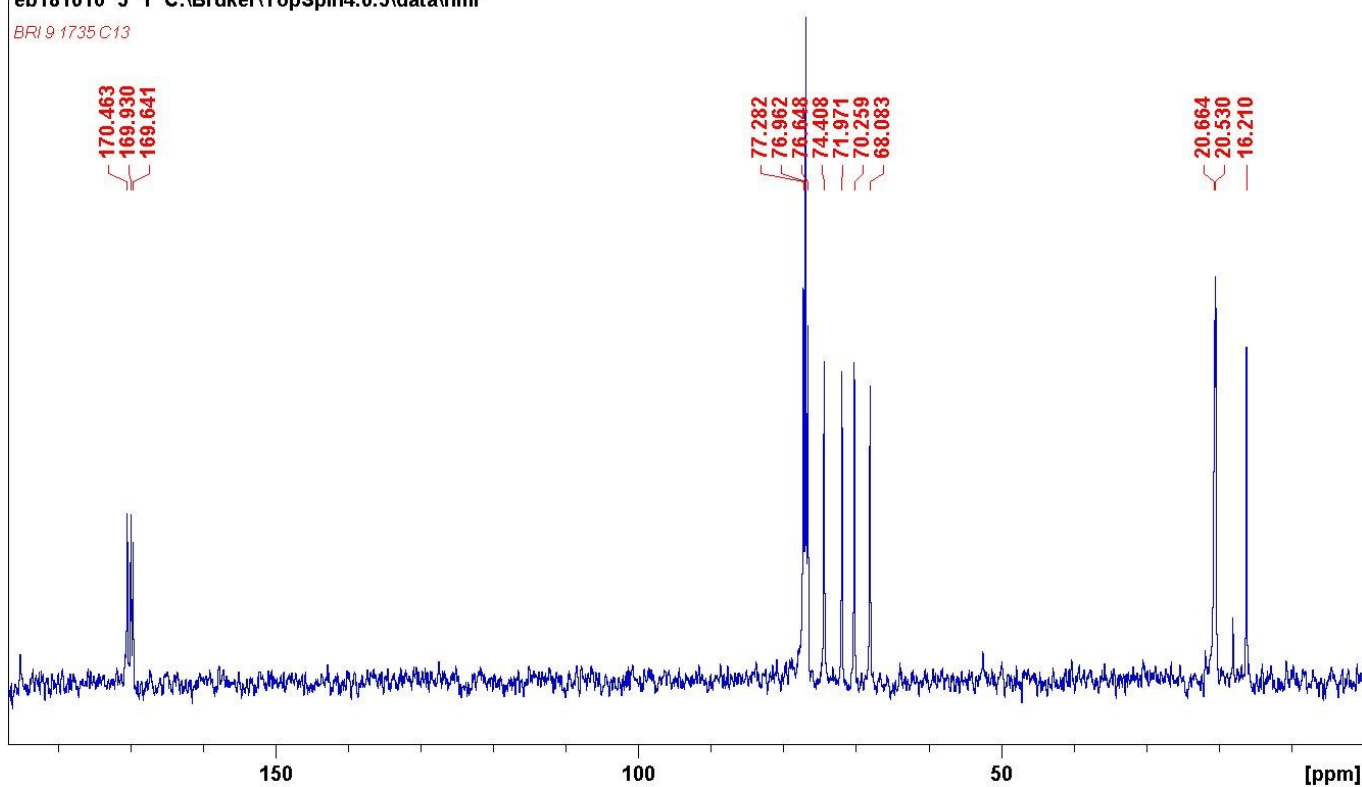

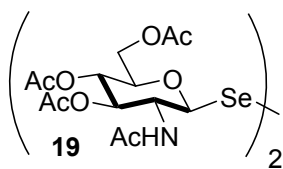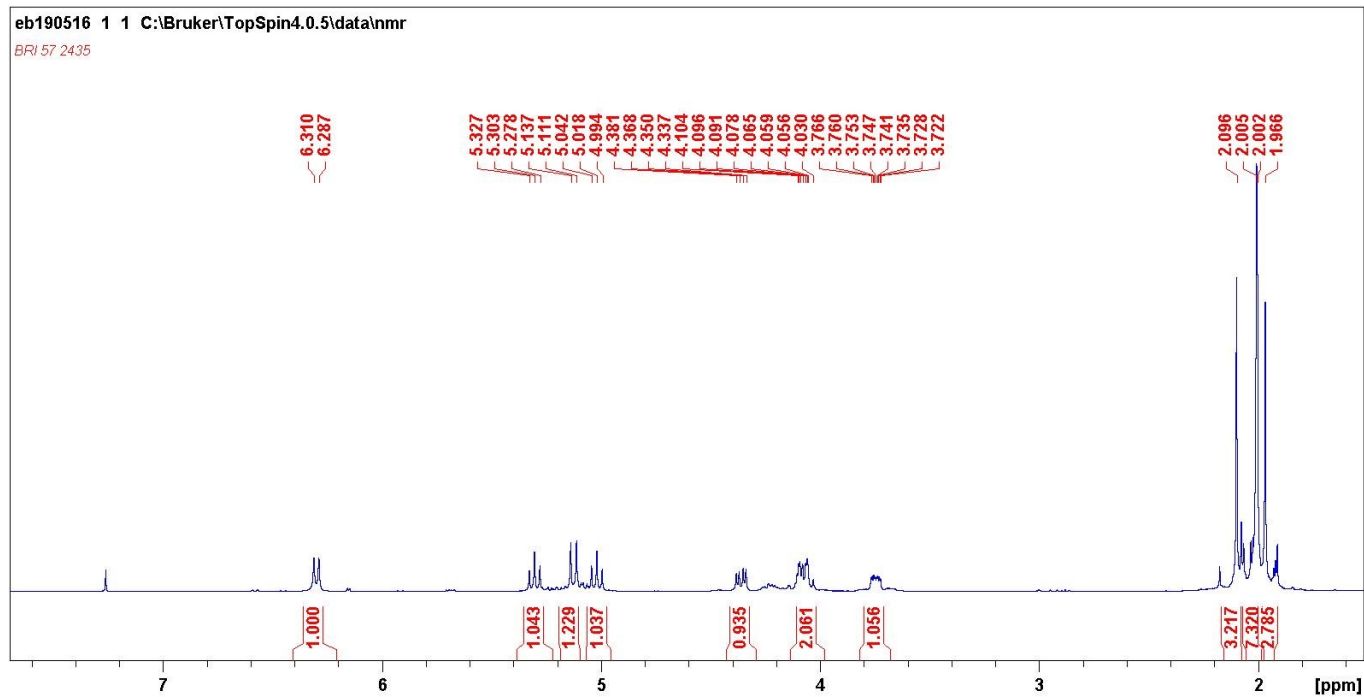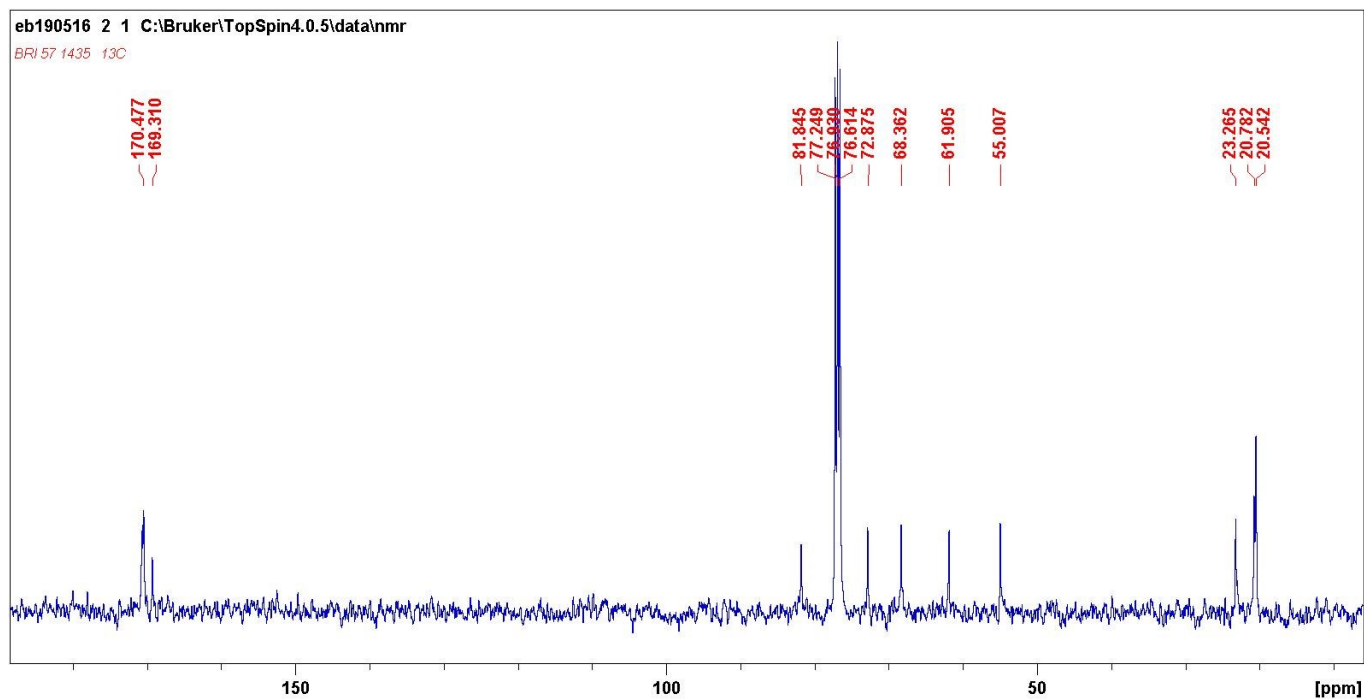

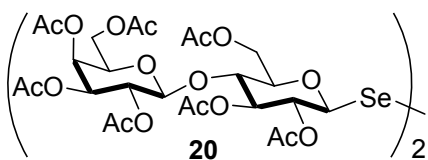

eb200524 4 1 C:\Bruker\TopSpin4.0.5\data\nmr

BRI 59 col 3 crom Lac2Se2 xOAc

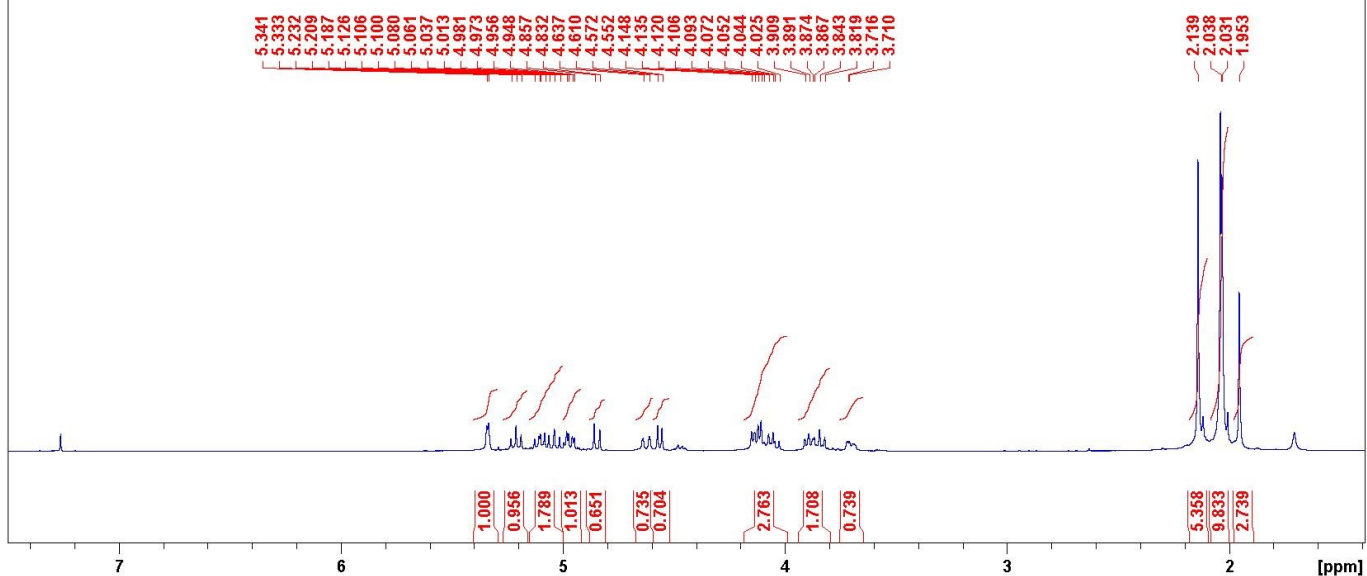

eb200524 5 1 C:\Bruker\TopSpin4.0.5\data\nmr

BRI 59 col 3 crom Lac2Se2 xOAc 13C

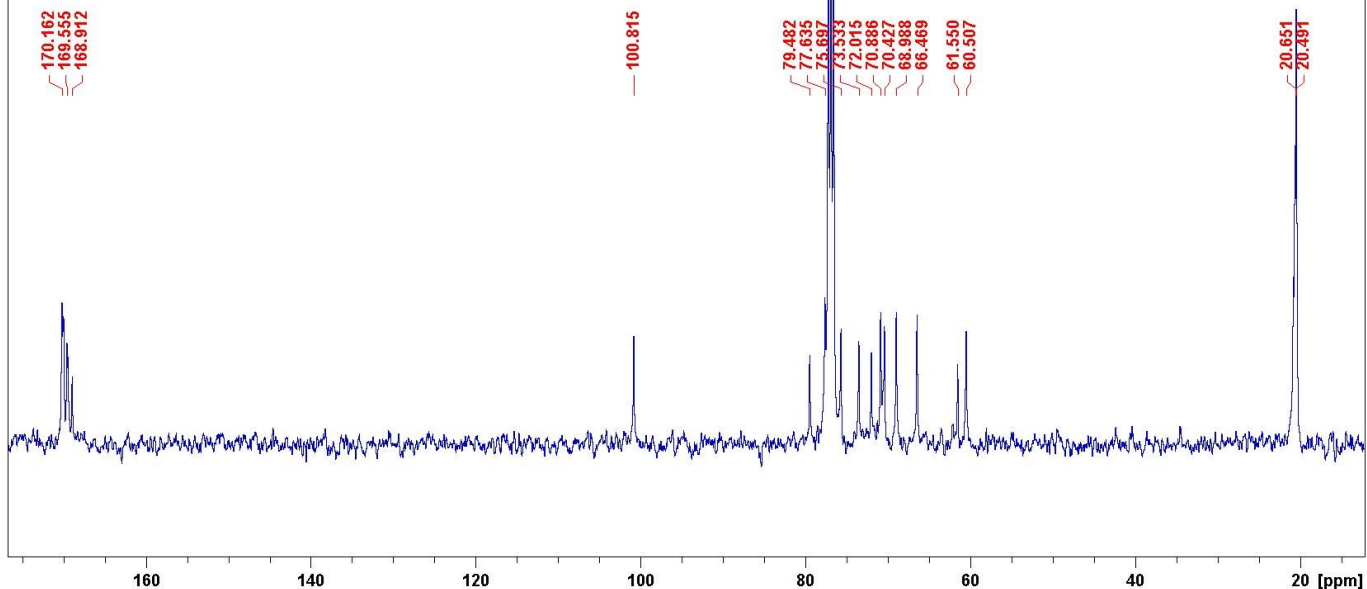

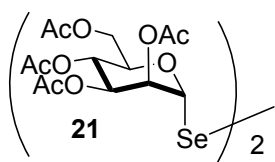

eb200904 12 1 C:\Bruker\TopSpin4.0.5\data\nmr

BRI 190 2331

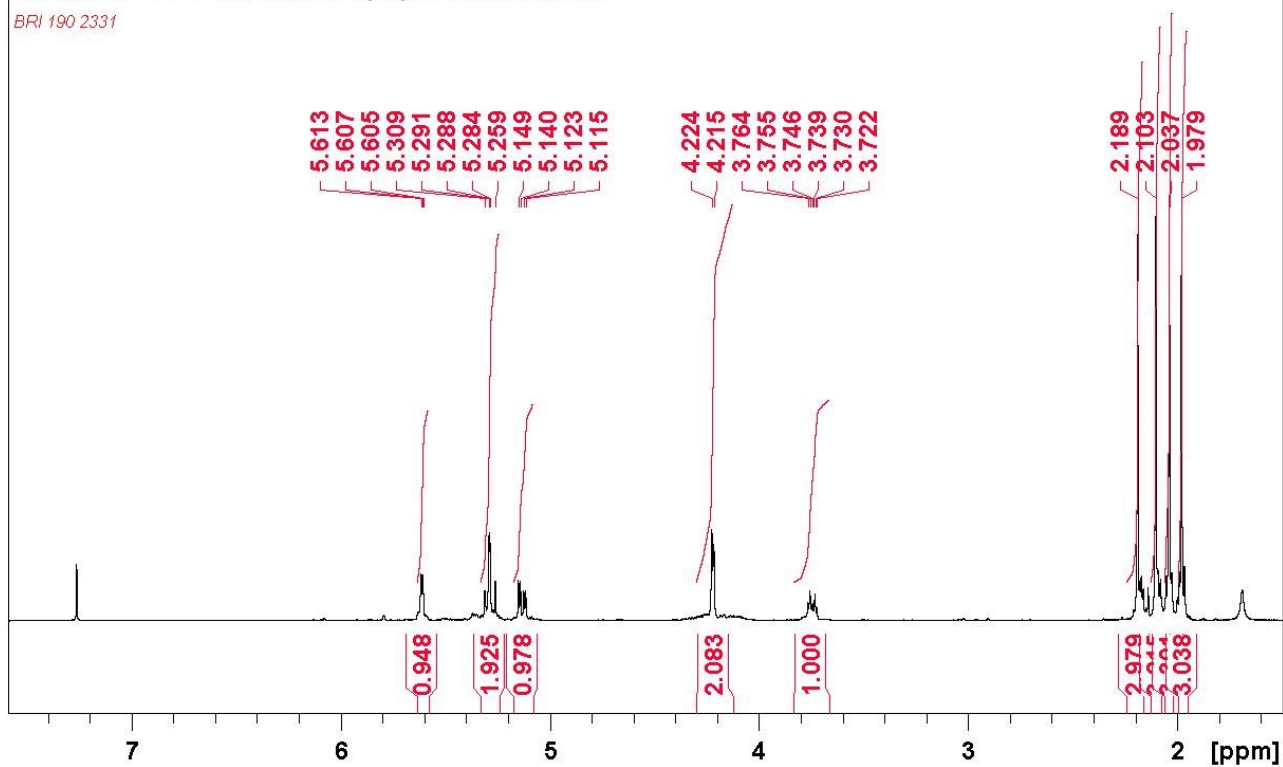

eb200904 13 1 C:\Bruker\TopSpin4.0.5\data\nmr

BRI 190 2331 13C

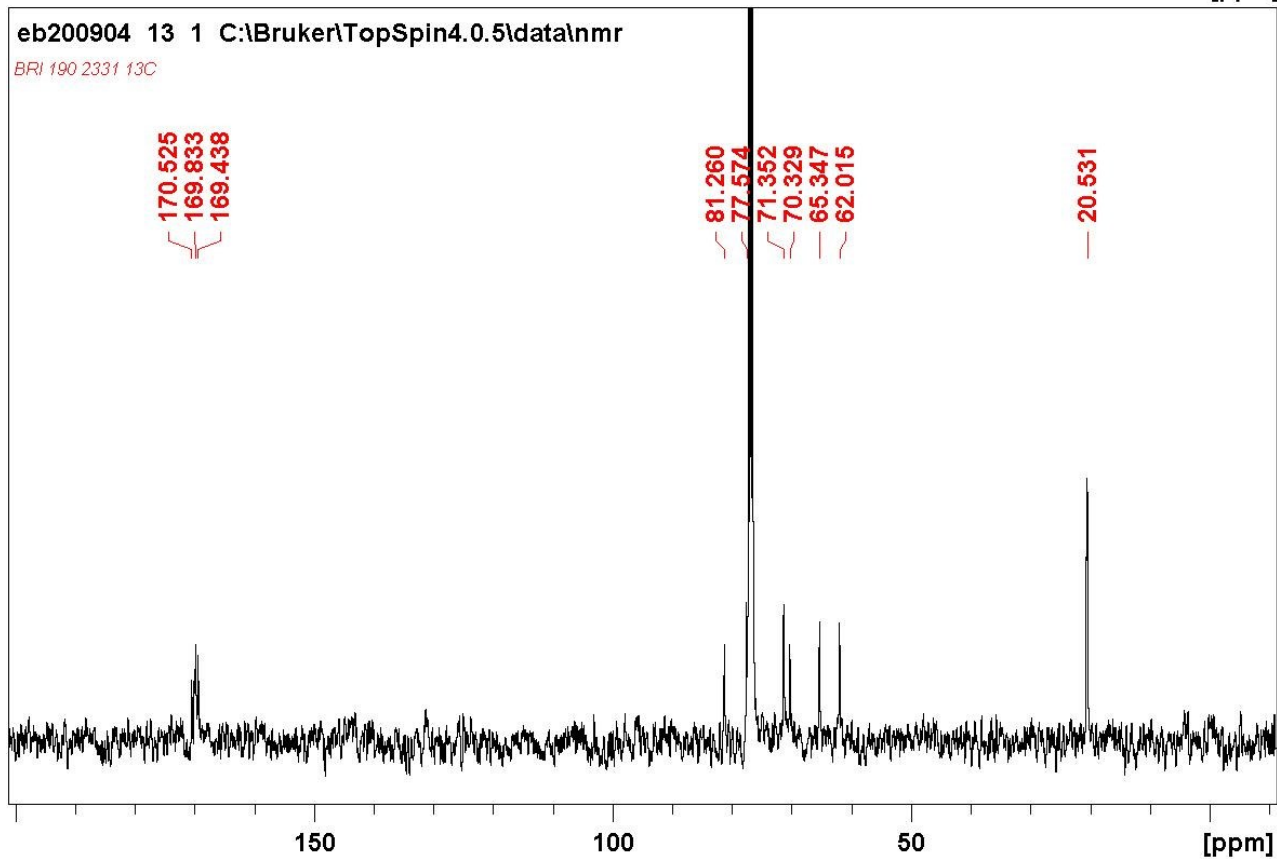

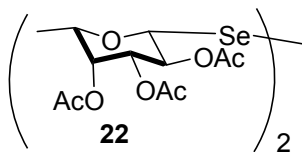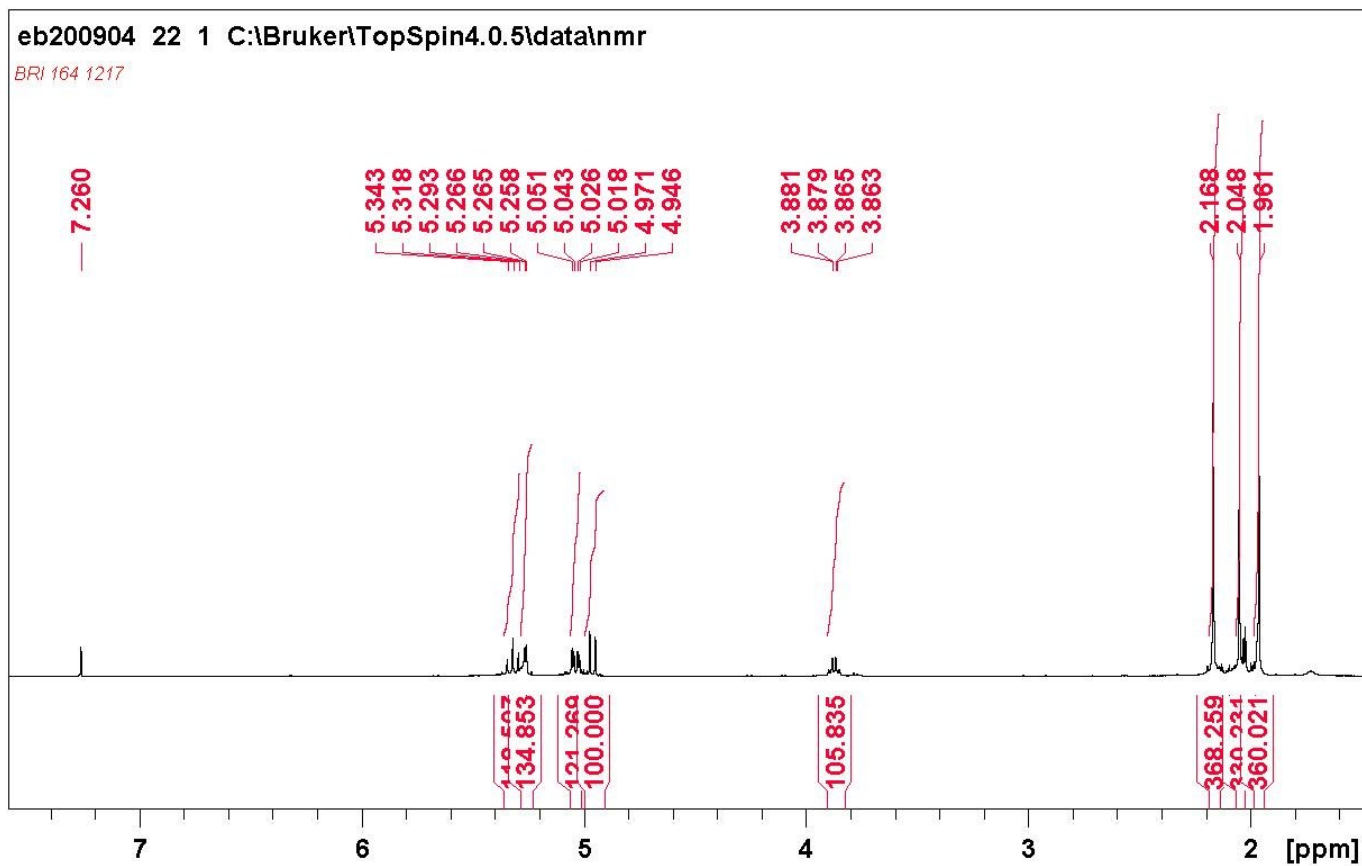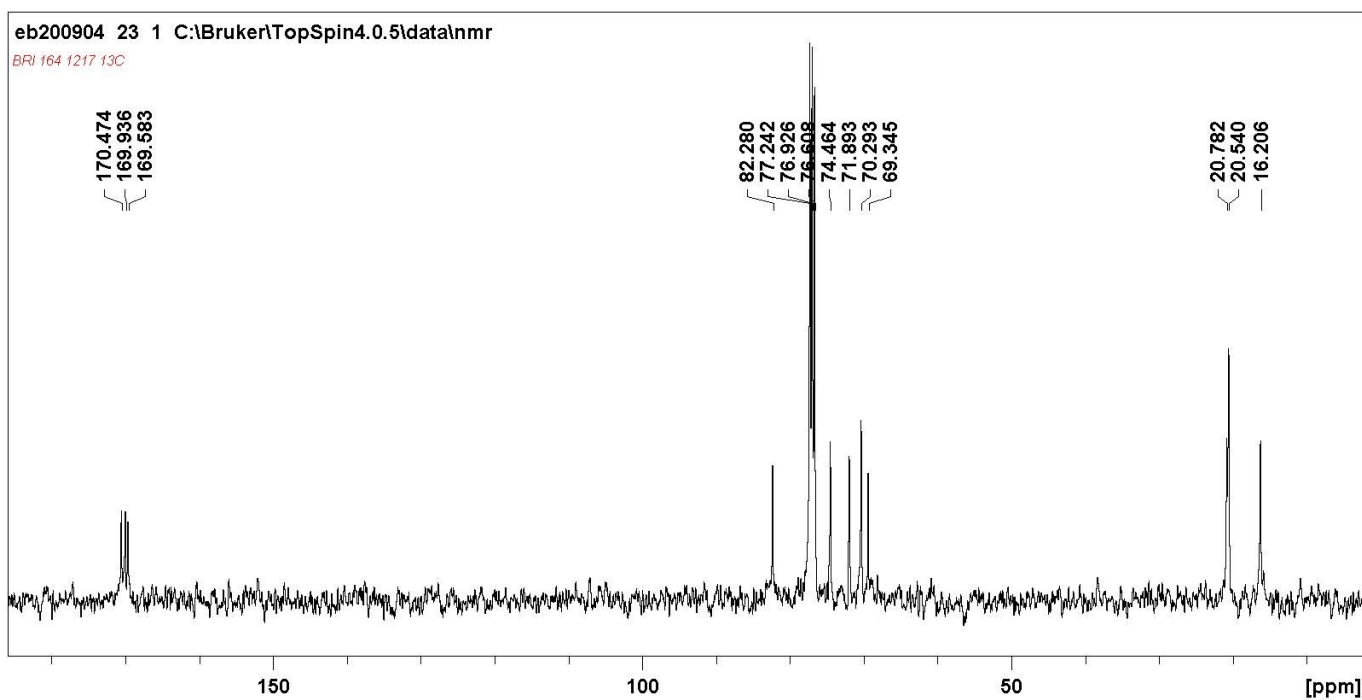

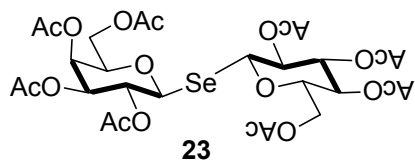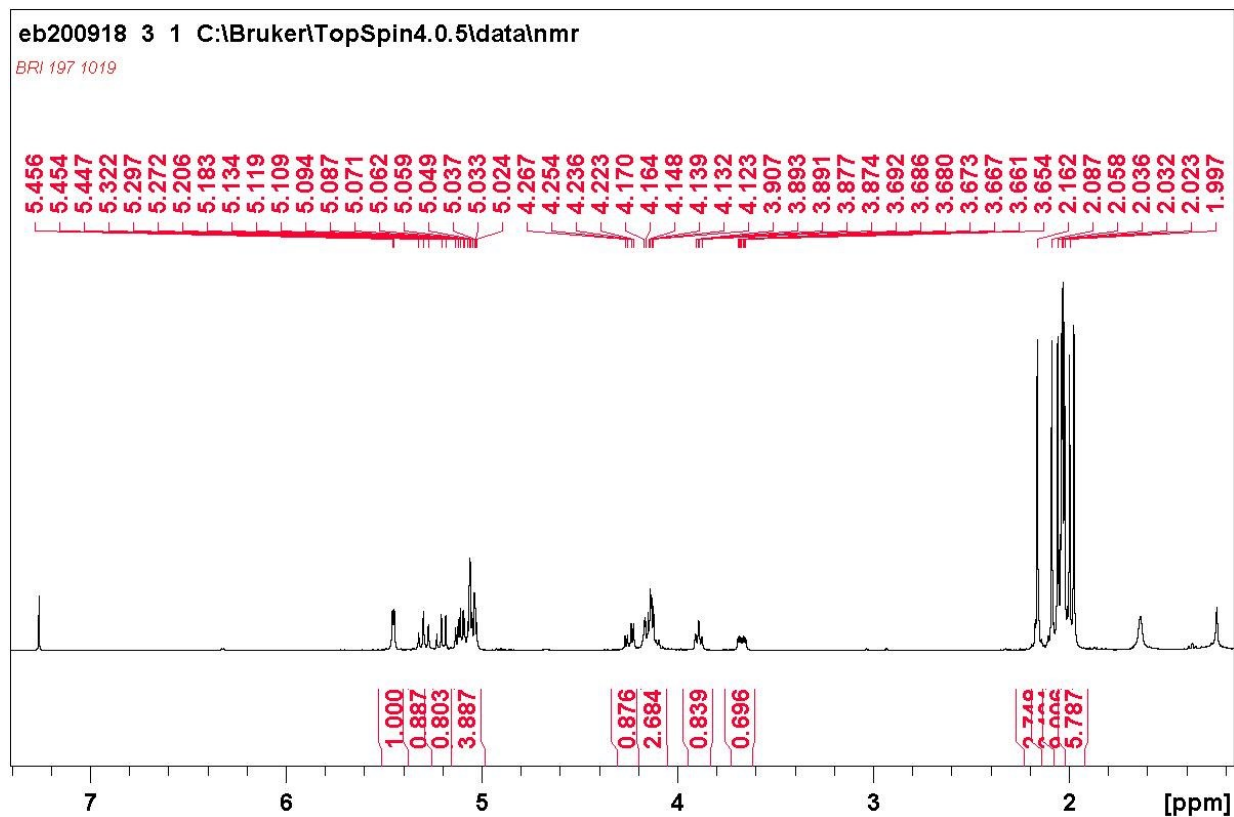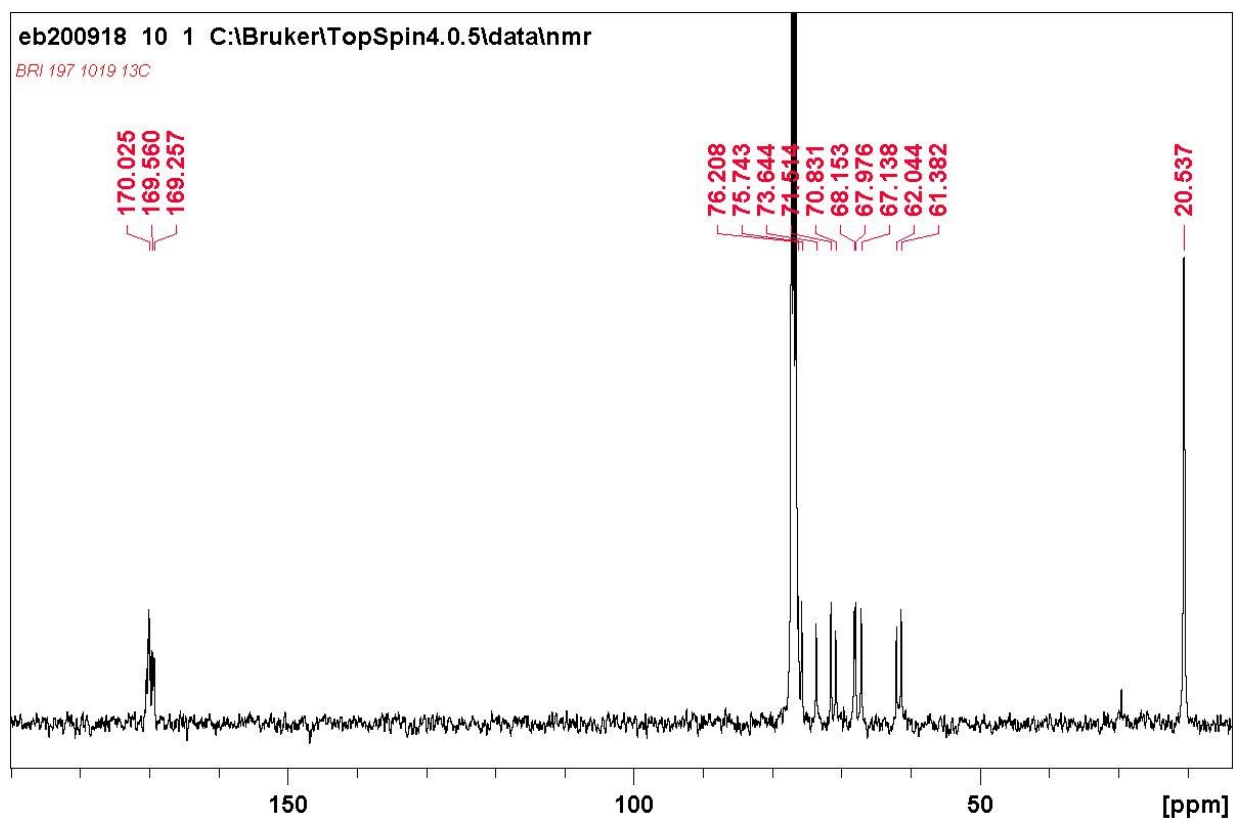

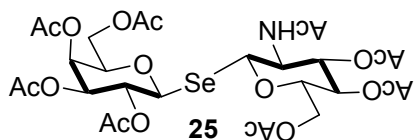

eb200918 11 1 C:\Bruker\TopSpin4.0.5\data\nmr

BRI 201 812

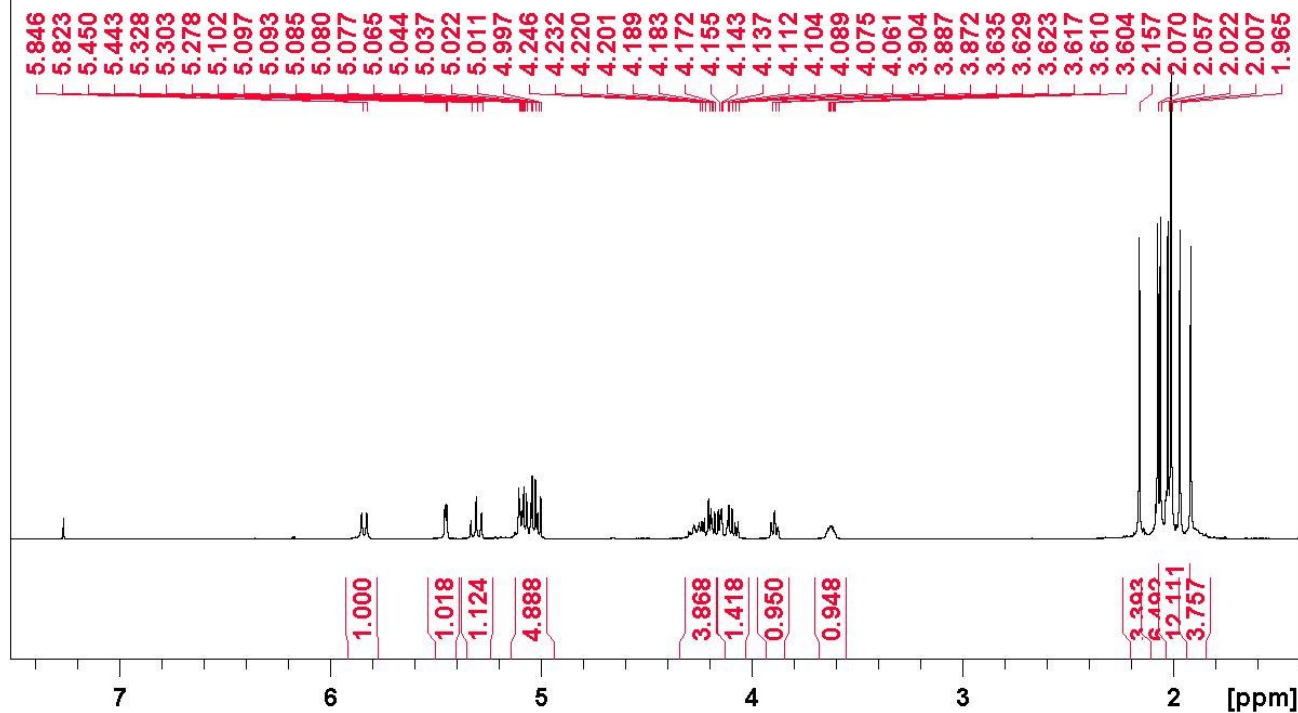

eb200918 12 1 C:\Bruker\TopSpin4.0.5\data\nmr

BRI 201 812 13C

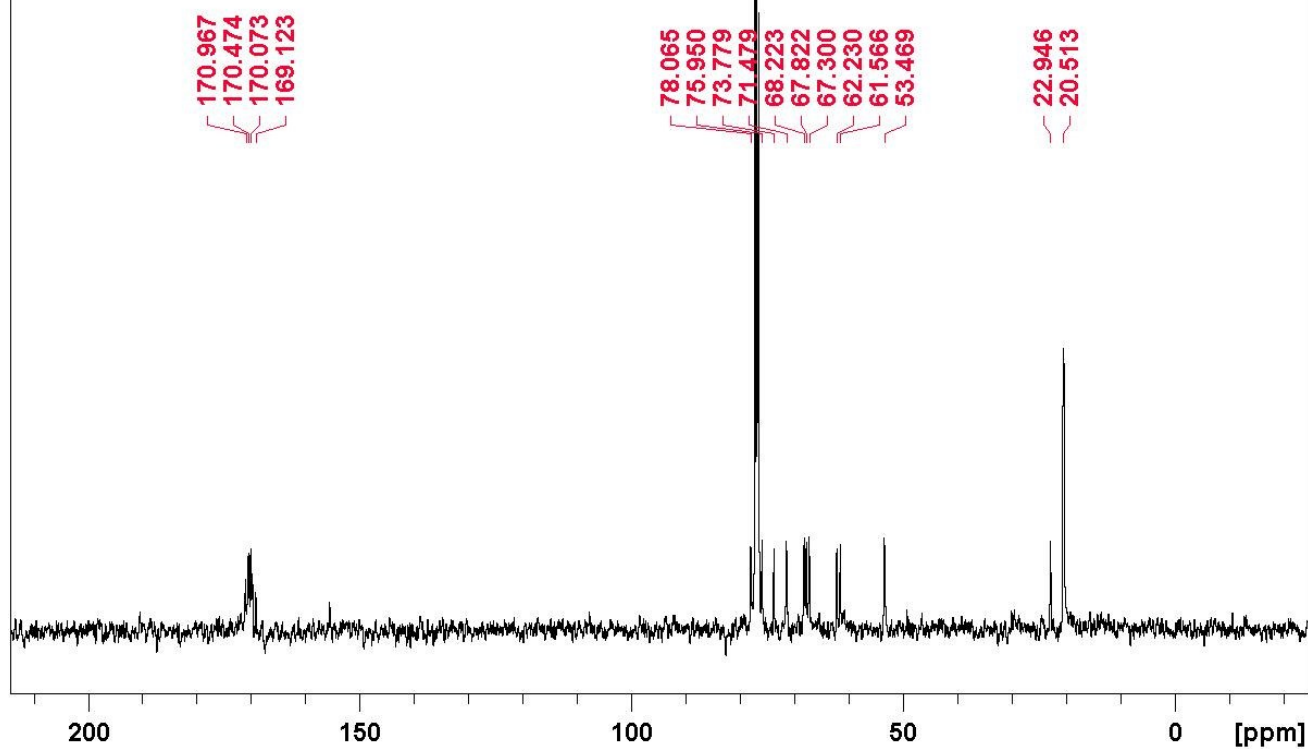

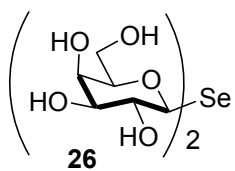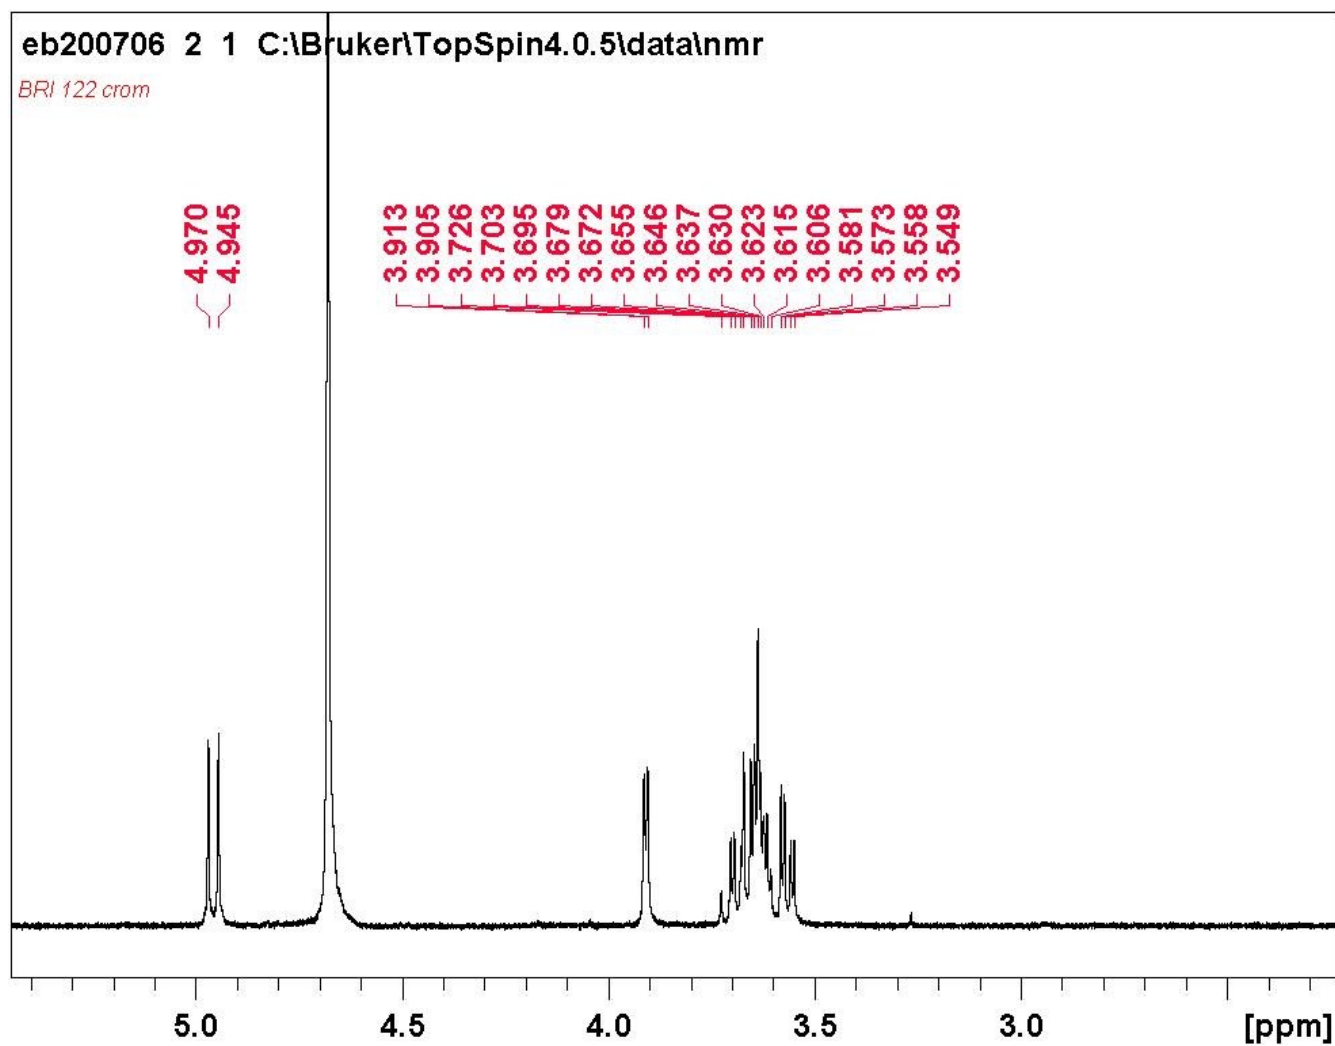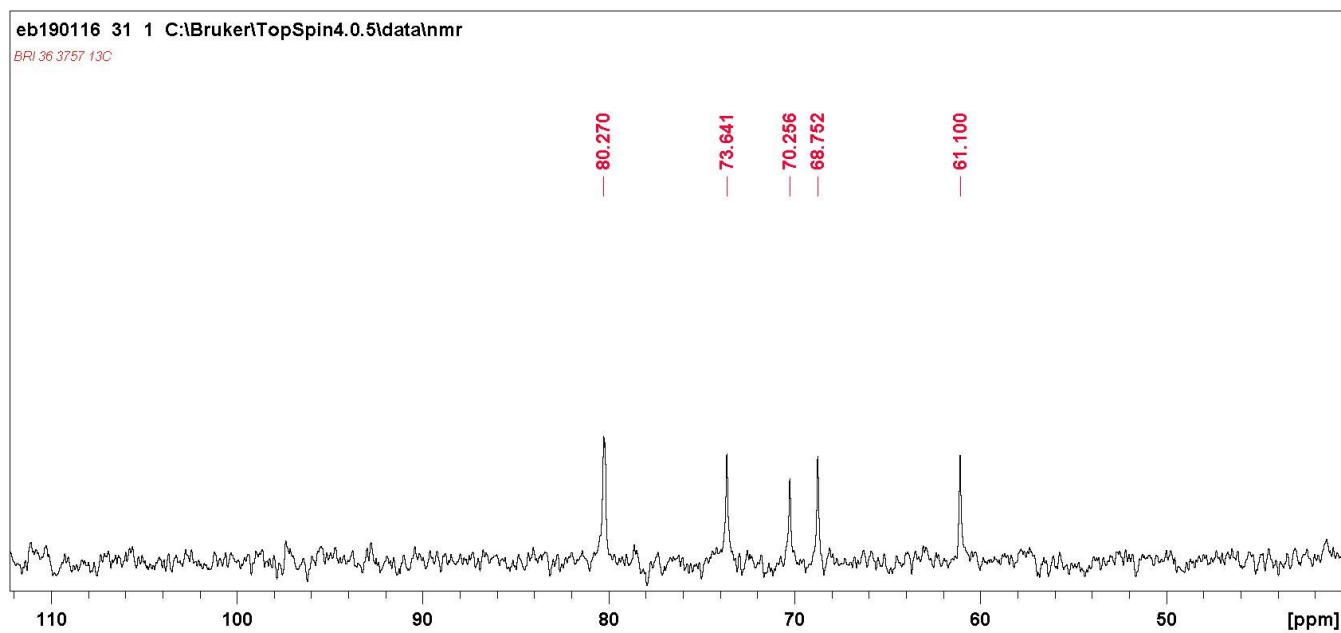

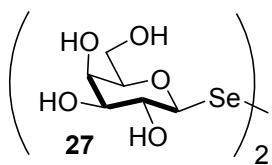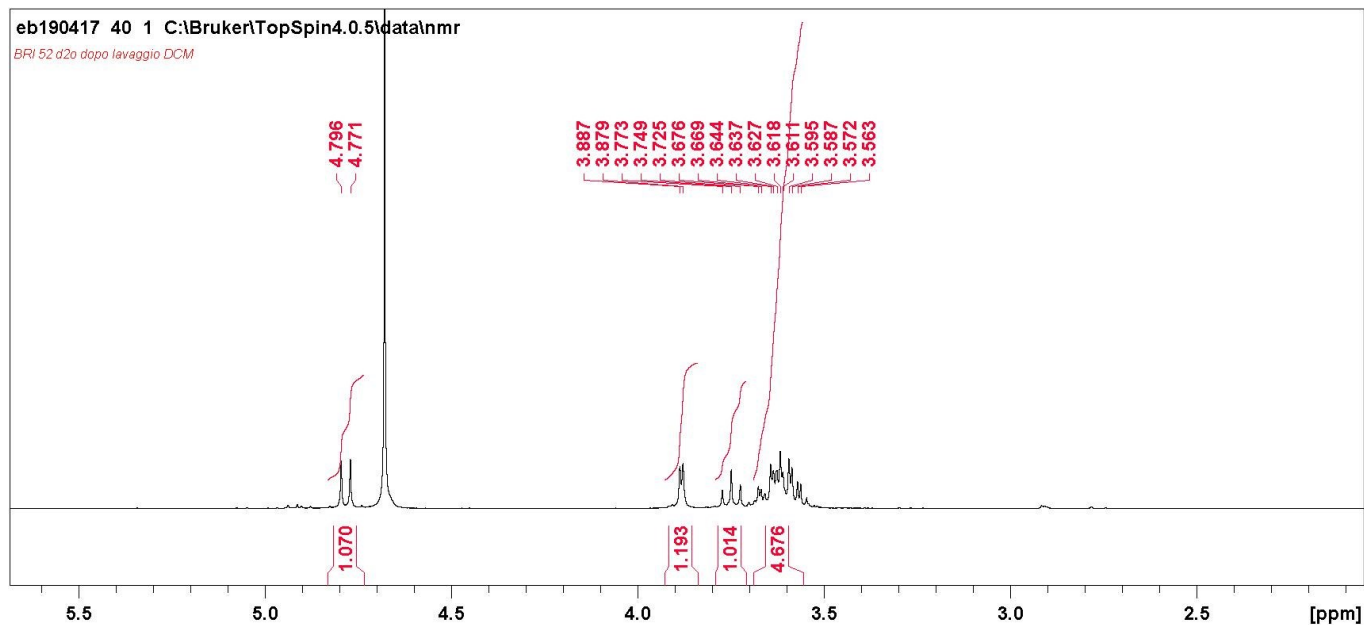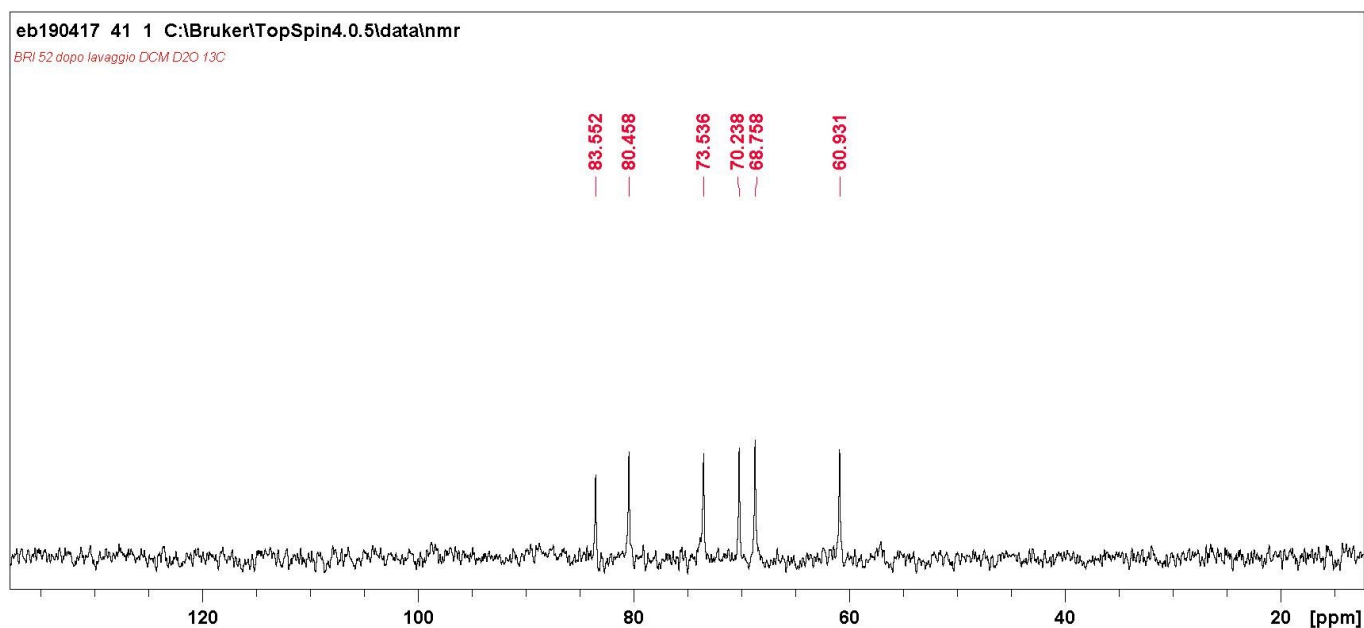

## **Experimental section for the biological activity**

**Culture conditions.** Human T lymphoblastoid (Jurkat) and human melanoma WM266 cell lines were grown in RPMI medium supplemented with heat inactivated 10% fetal bovine serum (FBS), 2.5 mM glutamine, 100 U/ mL penicillin, and 100 µg/mL streptomycin (Euroclone). Human adenocarcinoma cell line (HeLa) was grown in DMEM supplemented with 10% fetal bovine serum (FBS), 1% glutamine, 100 U/mL penicillin and 100 µg/mL streptomycin (Euroclone, Milano, Italy). Cells were maintained in humidified air containing 5% CO<sub>2</sub>, at 37 °C.

**Antiproliferative Activity.** Cells were plated at density of 10000 cells/well for Jurkat, 2000/well for WM266 and 1200 cells/well for HeLa, in 96 well microplates (Corning). After 24h incubation, cells were treated with increasing concentration of synthesized compounds previously solubilized in H<sub>2</sub>O at 10 mM concentration. Cell proliferation was determined by using (2-(2-methoxy-4-nitrophenyl)-3-(4-nitrophenyl)-5-(2,4-disulfophenyl)-2H-tetrazolium, monosodium salt (CCK-8 Sigma Aldrich) for Jurkat cells and the 3-(4,5-dimethylthiazol-2-yl)-2,5- diphenyltetrazolium bromide assay (MTT, Sigma Aldrich) for HeLa and WM266 cells, after 48h treatment. Plates were then analyzed by using a microplate reader (Enspire, Perkin Elmer, USA) at 450 (CCK-8) or 570 nm (MTT). The results are presented as the percentage of proliferating cells respect to the control (vehicle treated cells) and are expressed as means ± SE of, at least, two independent experiments performed in triplicate. The IC<sub>50</sub> values were calculated by GraphPad Prism software.

## **Results**

### **In vitro antiproliferative activity**

The anti-proliferative effect of synthesized compounds was evaluated on three human tumor cell lines of disparate histological origin, leukemia (Jurkat), cervical adenocarcinoma (HeLa), metastatic melanoma cells (WM266). Cells were treated with the molecules at rising concentrations from 7 to 500 µM, for 48h. The digalactosyl selenide does not affect the proliferation of each cell line examined, also at concentration > 500 µM. Differently, digalactosyl diselenide shows a dose-dependent inhibition of proliferation of all tested cell lines. In particular, digalactosyl diselenide, displays a significant effect on WM266 and Jurkat cell proliferation, with IC<sub>50</sub> values of 54.7 and 56.0 µM respectively, and a lower interference with the growth of HeLa cells (IC<sub>50</sub>=120µM).

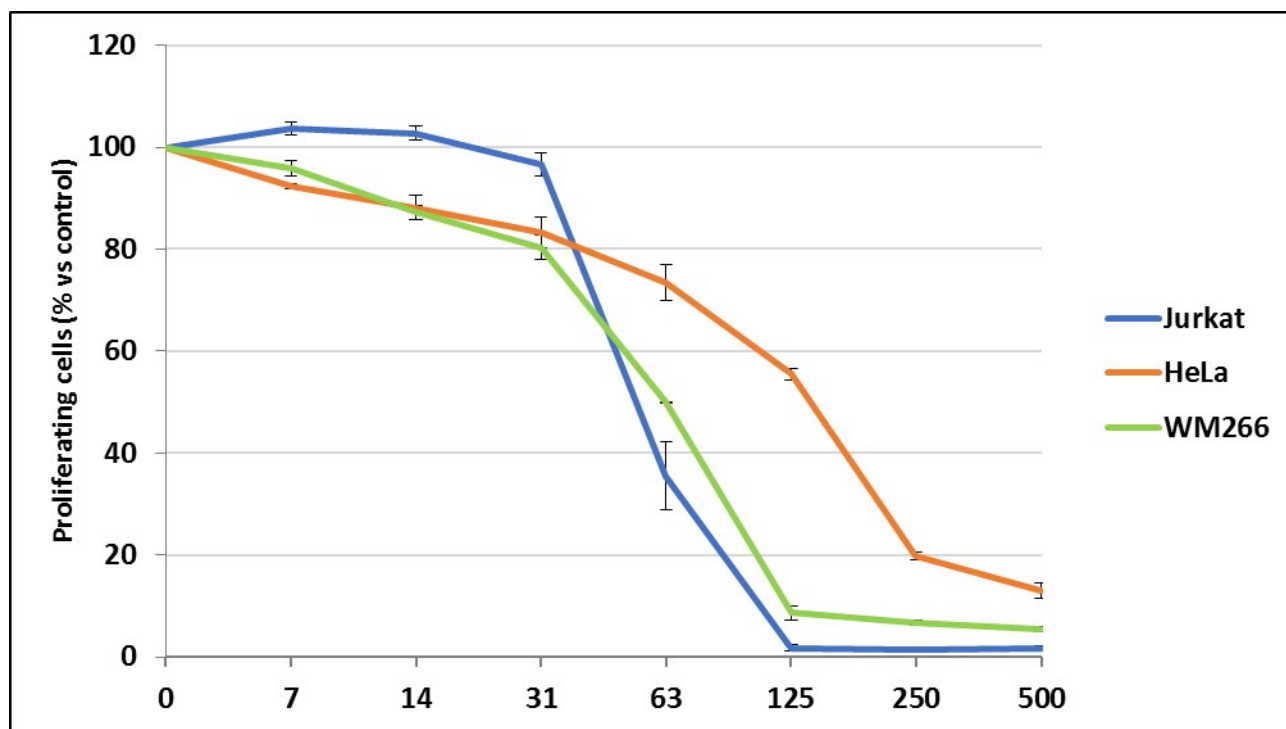

**Figure.** Anti-proliferative assay of digalactosyl diselenide **27** on Jurkat, WM266 and HeLa cell lines. The cells were incubated in the presence of compound at the indicated concentrations at 37 °C for 48h. The results are presented as the percentage of proliferating cells with respect to the control (vehicle treated cells) and are expressed as means  $\pm$  SE.

**Table: IC<sub>50</sub> values**

| Entry | IC <sub>50</sub> (μM) |               |              |
|-------|-----------------------|---------------|--------------|
|       | WM266                 | Jurkat        | HeLa         |
|       | 54.7 $\pm$ 18         | 56.0 $\pm$ 24 | 120 $\pm$ 16 |
